1 **Biomarkers of insulin resistance and their performance as predictors of treatment response**  
2 **in adults with risk factors for type 2 diabetes.**

3  
4 RJ Brogan<sup>1,2</sup>, O Rooyackers<sup>3</sup>, BE Phillips<sup>4</sup>, B Twelkmeyer<sup>3</sup>, LM Ross<sup>5</sup>, PJ Atherton<sup>3</sup>, WE  
5 Kraus<sup>5</sup>, JA Timmons<sup>2,6\*</sup> and IJ Gallagher<sup>7\*</sup>

6  
7 **Affiliations**

8  
9 <sup>1</sup>Anaesthesia, Pain and Perioperative Medicine, Fiona Stanley Hospital, Perth, WA, Australia

10 <sup>2</sup>Augur Precision Medicine LTD, Stirling, Scotland

11 <sup>3</sup>Division of Anesthesiology and Intensive Care, CLINTEC, Karolinska Institutet, Sweden

12 <sup>4</sup>Clinical, Metabolic and Molecular Physiology Research Group, School of Medicine, University  
13 of Nottingham, Derby, England

14 <sup>5</sup>Duke University School of Medicine, Durham, NC, USA

15 <sup>6</sup>Faculty of Medicine and Dentistry, Queen Mary University of London, London, England

16 <sup>7</sup>Center for Biomedicine and Global Health, Edinburgh Napier University, Edinburgh, Scotland

17 \* Senior Authors

18  
19 **Key words:** T2DM, Insulin resistance, biomarkers, regression, Bayesian projective prediction

20  
21 **Corresponding author:** [robert.brogan@health.wa.gov.au](mailto:robert.brogan@health.wa.gov.au)

22

23

24

25

26 **Abstract**

27

28 Insulin Resistance (IR) is a component of the pathogenesis of type 2 diabetes mellitus (T2DM),  
29 and risk factor for cardiovascular and neurodegenerative diseases. Amino acid and lipid  
30 metabolomic IR diagnostics associate with future T2DM risk in epidemiological cohorts. Whether  
31 these assays can accurately detect altered IR following treatment has not been established. In the  
32 present study we evaluated the ability of metabolomic diagnostics to predict altered IR following  
33 exercise treatment. We evaluated the performance of two distinct insulin assays and built  
34 combined clinical and metabolomic IR diagnostics. These were utilised to stratify IR status in the  
35 pre-intervention fasting samples in three independent cohorts (META-PREDICT (MP, n=179),  
36 STRRIDE-AT/RT (S-2, n=116) and STRRIDE-PD (S-PD, n=149)). Linear and Bayesian  
37 projective prediction strategies were used to evaluate biomarkers for fasting insulin and HOMA2-  
38 IR and change in fasting insulin with treatment. Both insulin assays accurately quantified  
39 international standard insulin ( $R^2 > 0.99$ ), yet agreement for fasting insulin was less congruent  
40 ( $R^2 = 0.65$ ). Only the high-sensitivity ELISA assay could identify the mean effect of treatment on  
41 fasting insulin. Clinical-metabolomic models were statistically related to fasting insulin ( $R^2$  0.33  
42 – 0.39) but had modest capacity to classify HOMA2-IR at a clinically relevant threshold.  
43 Furthermore, no model predicted treatment responses in any cohort. Thus, we demonstrate that the  
44 choice of insulin assay is critical when quantifying the influence of life-style on fasting insulin,  
45 while none of the clinical-metabolomic biomarkers, validated in cross-sectional data, are suitable  
46 for monitoring longitudinally changes in IR status.

47

48

49

## 50 **Introduction**

51  
52 Chronic hyperinsulinaemia, a feature of type 2 diabetes mellitus (T2DM), contributes to a cycle of  
53 events driving further insulin resistance (IR)<sup>1</sup>, promoting cardiovascular<sup>2</sup> and neurodegenerative  
54 diseases<sup>3</sup>. Extreme IR also represents a distinct category of T2DM<sup>4</sup>. Lifestyle based treatments  
55 are effective at reducing the risk of developing T2DM.<sup>5-8</sup> Such programs, typically involving  
56 exercise training, modify IR with high intra-individual variability.<sup>9-14</sup> Similar variability is  
57 observed in response to drug treatment.<sup>15,16</sup> While monitoring the efficacy of treatment on glucose  
58 tolerance in large cohorts is relatively straightforward<sup>17</sup>, the same cannot be said for monitoring  
59 insulin action.<sup>18,19</sup> Furthermore, the varying characteristics of commonly used insulin assays  
60 complicate comparison across studies.<sup>20,21</sup> There are clear clinical definitions for diagnosing  
61 T2DM and impaired glucose tolerance (IGT) but less so for IR, possibly due to the lack of  
62 widespread measurement of insulin. This is problematic because IR is distinct from glucose  
63 intolerance and can precede T2DM and slowly developing age-related diseases by decades and  
64 thus there is an urgent need to enable tracking over time IR.<sup>22,23</sup>

65  
66 This need for cost-effective practical IR diagnostics has stimulated the development of several  
67 clinical<sup>24</sup> and molecular prototypes, including assays relying on branched-chain amino acids  
68 (BCAA)<sup>25-28</sup>, plasma lipoproteins<sup>29-31</sup> and multi-protein signatures.<sup>32</sup> The abundance of several  
69 circulating amino acid and plasma lipids have been incorporated into statistical models that predict  
70 IR in cross-sectional, prospective or retrospective analyses (i.e. predict T2DM risk).<sup>25-27,29-31,33</sup>  
71 Circulating BCAA are particularly attractive as surrogates for IR because disrupted catabolism of  
72 individual BCAA have been mechanistically and causally linked to IR, cardiovascular and

73 neurodegenerative disease processes in recent years <sup>13,28,34-43</sup>. It remains unclear how well  
74 abundance of BCAA in the circulation reflects the mechanistic role of BCAA within the key tissues  
75 responsible for their catabolism and therefore in turn their ability to track with changes in  
76 metabolic fitness.

77  
78 In addition to predicting IR, it would therefore be ideal if metabolic ‘risk’ biomarkers could  
79 reliably associate with improvements in IR following treatment, so that non-responders could be  
80 reallocated to alternative treatments. <sup>14-16,44,45</sup> There have been attempts to establish if plasma  
81 BCAA abundance tracks treatment responses yielding conflicting conclusions, partly because  
82 existing studies have been too small to reliably explore such relationships. <sup>46,47</sup> Determinants of  
83 insulin action also reflect a combination of distinct acute mechanisms in the hours post-exercise,  
84 and more stable long-term adaptive changes <sup>48</sup> – such as increased tissue vascularisation. <sup>49</sup> Such  
85 temporal influences have not been considered when evaluating these novel biomarkers.  
86 Immediately post-exercise insulin action and glucose tolerance can be impaired, while insulin  
87 responses to an oral glucose tolerance test (OGTT) appear lowest 72hr following the previous  
88 exercise training session.<sup>50</sup>

89  
90 In the present analyses we have assessments of IR within 24hr and 48-72hr after the last training  
91 session of chronic exercise training that was effective in reducing group mean HOMA2IR. The  
92 idea is that novel biomarkers should offer practical (e.g. cost, simplicity) advantages over  
93 laboratory insulin assays, and if they can be shown to predict longitudinal changes in IR, then  
94 efforts to configure low-cost standardised assay from minimally invasive sampling would be  
95 motivated. In the present multi-study analysis, we evaluated, in hundreds of individuals at-risk for

96 T2DM, the performance of established BCAA and lipid biomarkers, combined with simple to  
97 measure clinical phenotypes to estimate fasting IR and predict changes in insulin following  
98 supervised lifestyle interventions.<sup>9,12,51,52</sup> We established that choice of insulin assay is critical for  
99 capturing interactions between exercise status and fasting insulin, while plasma biomarkers of IR  
100 status, from cross-sectional and prospective studies, are unable to track with treatment responses.

101

## 102 **Results**

103

104 Demographic, blood and metabolomic data for the three independent cohorts - STRRIDE AT/RT  
105 (S-2), STRRIDE-PD (S-PD) and MP - are presented in **Table 1**.

106

### 107 *Comparison of insulin assay and metabolomics assay performance*

108 A long-standing challenge is that commercial assays for insulin show distinct specificity and  
109 sensitivity profiles, with no agreement to move to a single standard assay.<sup>20,21</sup> Some historical  
110 insulin assays, utilised in exercise intervention studies (e.g. HERITAGE)<sup>53</sup> or included in genome-  
111 wide association modelling,<sup>54</sup> do not show molecular associations consistent with modern more  
112 specific insulin assays.<sup>13</sup> We produced a large-scale comparison of two typical insulin assays (the  
113 immunoassay based automated analyzer (Immulite 2000) and a manual high sensitivity ELISA kit  
114 (Dako, Stockholm, Sweden), run in parallel on samples obtained before and after exercise-training  
115 that reduced IR.<sup>55</sup> Both Immulite 2000 and Dako ELISA showed near perfect ( $>R^2=0.99$ )  
116 correlation with the international WHO standard for insulin (National Institute for Biological  
117 Standards and Control, **Figure S1A-B**). No cross reaction with c-peptide standard was detected  
118 (data not shown). When plotting insulin values from the same fasting samples, there was moderate

119 agreement between the two assays ( $R^2=0.65$ , **Figure S2**). Critically, insulin measured using the  
120 high-sensitivity ELISA was able to detect a group mean reduction following exercise training,  
121 while the Immulite 2000 immune-assay could not (**Figure 1**). All the subsequent analyses relied  
122 on the data generated by the Dako high-sensitivity ELISA (produced in a single laboratory).

123

#### 124 *Biomarker association with fasting insulin and HOMA2-IR status*

125 Predictor variables were selected based on the literature summarised above, and availability in all  
126 three cohorts. Linear regression was performed to explore individual relationships between fasting  
127 insulin and the selected clinical and metabolomic biomarkers (**Figure 2**; full results in **Table S1**).

128 In MP, all pre-selected variables other than age ( $p=0.09$ ) reached statistical significance for  
129 association with fasting insulin (age is a reliable covariate but the age-range in MP was limited).

130 In S-2  $\log_{10}$  BMI ( $p<0.001$ ), fasting glucose ( $p<0.001$ ), HDL ( $p=0.007$ ), TAG ( $p<0.001$ ) and amino  
131 acids (isoleucine (ILE)  $p=0.0005$ , leucine (LEU)  $p=0.006$ , valine (VAL)  $p<0.001$ , alanine (ALA)

132  $p=0.0027$ ) were linearly associated with fasting insulin. Similar levels of associations were

133 observed in the S-PD cohort, except for ALA ( $p=0.068$ ). For multi-variable predictors of fasting

134 insulin (or HOMA2-IR) and predictors of treatment responses, variables which showed a

135 statistically significant association in one or more of the cohorts were considered (as each was

136 supported with published evidence for having an association in cross-sectional cohorts).

137

138 As each study used some distinct metabolomic methods (see Methods) we performed multivariable

139 linear regression and logistic regression with K-fold cross validation ( $k=10$ ) separately in MP, S-

140 2 and S-PD cohorts. Four models were considered; a baseline model (age, BMI and gender), a

141 BCAA model (age, BMI, gender and sum of BCAA), a lipid model (age, BMI, gender, HDL, LDL

142 and TAG) and finally, a combined model (age, BMI, gender, BCAA, HDL, LDL and TAG). The  
143 combined model estimated fasting insulin ( $R^2$  0.33 – 0.39), with the results in agreement with  
144 previous observations (**Table 2**). Fasting glucose was excluded when predicting IR status. For IR  
145 ROC analysis, insulin sensitive (IS, HOMA2-IR <1.3) and insulin resistant (IR, HOMA2-IR  $\geq$ 1.3)  
146 was defined based on results from a large population study (n=95,540) where HOMA2-IR  $\geq$ 1.3  
147 was associated with an increased risk for the development of T2DM over a median of 4.7y (hazard  
148 ratio of 3.2 (95% CI 1.9-5.3)).<sup>56</sup> The four models were assessed in each cohort for their ability to  
149 classify IS vs IR (**Figure 3**). The baseline model had no discriminatory performance in S-2, so the  
150 metabolomics variables improved that model substantially, however metabolomics did not add  
151 further to the clinical model ROC performance in MP or S-PD, and the best models had a modest  
152 Cohens Kappa (**Table S2**). This illustrates that even though BCAA and lipid models statistically  
153 associate with IR status, they do not contribute to a clinically useful model.

154

#### 155 *Biomarker based prediction of IR status in response to lifestyle intervention.*

156 We established that each biomarker statistically associated with fasting insulin in each study  
157 (**Table S1**) and as reported by others. Finally, we examined the utility of these biomarkers for  
158 *predicting* exercise treatment related insulin responses in IR. For this analysis we were able to  
159 include changes in fasting glucose (easy and inexpensive to measure) as we did not rely on the  
160 HOMA model. **Figure 4** displays the univariable linear relationships of changes in clinical and  
161 metabolomic biomarkers with changes in fasting insulin as measured with the high sensitivity  
162 ELISA over an exercise intervention in all three cohorts (**Figure S3** provides the correlation  
163 coefficients (including for individual amino acids). To examine the classification utility of  
164 individual and combinations of biomarkers we built Bayesian linear models, independently for

165 each cohort, modelling change in fasting insulin after each intervention. The models included age  
166 and changes over the intervention in individual BCAA, fasting glucose, BMI, lipids, systolic blood  
167 pressure and alanine. The full models (“reference” models) were considered as the optimum  
168 solution to the prediction task.<sup>57</sup> The posterior predictive distributions showed the models  
169 performed well and were able to predict data like that of the observed data (**Fig 4A-C**). Using  
170 projective prediction, we found that the biomarkers did not, however, improve predictive  
171 performance over a null model i.e. the intercept term (**Figure 4D-F**).<sup>58</sup> Thus, change in biomarkers  
172 (alone or additively combined) could not predict change in fasting insulin following an exercise  
173 intervention.

174

## 175 **Discussion**

176 Development of a cost-effective diagnostic for insulin sensitivity would help better understand the  
177 aetiology of T2DM and aligning clinical practice with the key recommendations of the  
178 International Diabetes Federation, namely early detection and prevention of pre-diabetes.<sup>59</sup>  
179 Hyperinsulinaemia drives altered insulin receptor expression potentially leading to further IR.<sup>1</sup> IR  
180 in turn contributes to cardiovascular disease<sup>2</sup> and dementia risk.<sup>3</sup> Insulin is not, however, routinely  
181 measured in the clinic and thus crucial information regarding the temporal nature of IR is lacking.  
182 Previous work has identified several potential biomarkers for IR in cross-sectional and prospective  
183 settings.<sup>25–27,29–31,33</sup> The present study extends this body of work to evaluate these IR biomarkers  
184 in the context of their ability to accurately classify changes in fasting insulin in response to exercise  
185 (MP and S2) or lifestyle (S-PD) based treatment for individuals with multiple risk-factors for  
186 T2DM.

187



188 *Importance of the insulin assay*

189 To our knowledge we are the first to demonstrate the importance of insulin assay choice on  
190 detecting changes in fasting insulin in large scale treatment studies. The MP cohort represents a  
191 typical group of sedentary middle-aged individuals with multiple risk factors for T2DM.<sup>12</sup> We note  
192 that the Immulite 2000 immunoassay was unable to detect exercise induced improvements in  
193 fasting insulin, while concurrent measurements using a high sensitivity ELISA assay did. Notably  
194 neither assay demonstrated any cross-reactivity with c-peptide and they both performed well in a  
195 standard curve analysis. The American Diabetes Association attempted to reach a consensus on  
196 standardizing the measurement of insulin.<sup>20,21</sup> Our analysis indicates that if environmental  
197 influences or treatment effects on fasting insulin levels are to be captured, a high-sensitivity ELISA  
198 assay should be utilised. We have previously reported that some older insulin assays, with  
199 undocumented specificity (e.g. HERITAGE),<sup>60</sup> were unsuitable for genomic association  
200 analysis.<sup>13</sup> Indeed, it is plausible that the use of insulin assays insensitive to variations across the  
201 ‘normal’ range of fasting insulin, or with cross-reactivity for C-peptide, have undermined genome-  
202 wide association modelling of fasting insulin.<sup>61</sup> While suboptimal insulin assays will not be  
203 voluntarily retired by manufacturers, it would seem sensible that the research community adopt  
204 the use of high-sensitivity assays for studies of fasting insulin in all situations (other than extreme  
205 hyperinsulinaemia)<sup>20,21</sup> especially when subtle gene-environment interactions are of interest to  
206 study.

207

208 *Metabolomic components of the IR biomarker models*

209 There is a well-established positive correlation between individual circulating BCAA and greater  
210 IR<sup>25–27</sup> and pathways that control BCAA catabolism have gained interest as possible targets for

211 reversing IR.<sup>28,62,63</sup> Furthermore, BCAA have been combined with clinical parameters to  
212 reportedly increase the performance of models that predict both IR and risk of T2DM.<sup>29,31,33</sup> We  
213 previously identified, using four independent cohorts, a transcriptional signature including BCAA  
214 catabolism pathway genes, that related to IR after adjustment for age, VO2max and BMI (n=564).  
215 We also found that in response to four independent lifestyle interventions (n=196), expression of  
216 16 genes in human skeletal muscle changed in proportion to improvements in insulin sensitivity,  
217 with 25% of those related to BCAA metabolism.<sup>13</sup> While this makes sense, as by mass, skeletal  
218 muscle has the largest capacity for BCAA catabolism in humans <sup>64</sup> it does not provide evidence  
219 that circulating levels of BCAA's will dynamically reflect tissue responses to insulin. In fact,  
220 insulin mediated BCAA clearance may also rely on other organs including the liver.<sup>65</sup>

221  
222 In a recent study, Lee *et al* claimed that baseline plasma BCAA levels related to change in glucose  
223 infusion rate during a hyperinsulinaemic–euglycaemic clamp (a measure of insulin sensitivity and  
224 liver fat content <sup>47</sup>). This was despite no change in total plasma BCAA levels and an increase in  
225 muscle BCAA catabolism pathway gene expression. We also found no change in group mean  
226 blood BCAA abundance with any exercise training protocol (**Table 1**), which might be  
227 understandable as only ~40% of subjects demonstrate a numerical improvement in HOMA2-IR  
228 and some demonstrate an increase in IR.<sup>12,13</sup> Nevertheless we did not find that changes in combined  
229 plasma BCAA were able to predict changes in IR status. This observation is consistent with earlier  
230 modelling approaches applied to the STRRIDE cohorts, where the combination of BCAA and  
231 lipid-based IR biomarkers could not predict changes in a measure of insulin sensitivity.<sup>17</sup> Various  
232 other combinations of BCAA and protein metabolites have been considered as IR models and  
233 while some shared variance has been observed,<sup>66</sup> these are most likely attributable to random

234 differences in small cohorts. Using energy restriction to modify IR, we recently reported that group  
235 mean differences in plasma BCAA abundance were also unchanged, despite group mean  
236 improvements in IR.<sup>66</sup> All of these observations contrast with a previous study, relying on a sample  
237 size a 10<sup>th</sup> of the present work, where changes in plasma BCAA abundance did track with improved  
238 IR status.<sup>46</sup>

239

240 We attempted several modelling strategies, including several distinct clinical and metabolomic  
241 variables, and modelled both fasting insulin and HOMA2-IR values to ensure our negative  
242 conclusions were rigorous. We used Bayesian modelling and projective prediction<sup>67,68</sup> to establish  
243 a sparse model that retained the ability to provide useful predictions of circulating insulin changes.  
244 Projective prediction uses the predictions from the reference (full) model to identify a subset of  
245 variables with predictive ability as close as possible to that of the full model. We were unable to  
246 identify any set of variables useful for predicting change in circulating insulin after lifestyle  
247 intervention using this strategy. Conventional regression modelling, against changes in HOMA2-  
248 IR also failed to identify a useful model. We can conclude that the present clinical-metabolic  
249 measures are not useful for classifying a HOMA2-IR threshold value indicative of 3-fold elevated  
250 risk of T2DM over 5 years, nor track altered fasting insulin with life-style interventions. This is  
251 even though our ELISA-based insulin values were strongly associated with causal molecular  
252 drivers of T2DM and insulin signalling in tissue samples.<sup>13</sup>

253

#### 254 *Clinical evaluation of IR biomarker models*

255 Diagnosing IR is challenging not least because defining IR remains controversial. The gold  
256 standard method is commonly described as the ‘clamp’ technique or intravenous glucose tolerance

257 test.<sup>19,69</sup> However, substantial resources are required for this such that it is rarely used for diagnosis  
258 and by their nature both can be supraphysiological (re levels of insulin). Alternative IR indices  
259 exist and include the homeostatic model assessment (HOMA and HOMA2<sup>70,71</sup>, Matsuda index<sup>72</sup>  
260 and the disposition index (DI).<sup>73</sup> These are not used in clinical practice, largely due to a lack of  
261 routine measurement of insulin. Although several epidemiological studies use HOMA and  
262 HOMA2 for modelling IR, there is limited basis for defining a clinical cut off value. Several studies  
263 unwisely use a percentile cut off identified within their individual cohort, and then apply ROC  
264 curve analysis to determine the threshold for a diagnosis of IR and then relate this to relative risk  
265 for relevant clinical outcomes e.g. progression to T2DM or cardiovascular disease. As a result, the  
266 HOMA IR threshold used across studies, to define ‘at risk’, has varied from 1.8 to 3.9 depending  
267 on the population studied and methods used.<sup>18</sup> This represents a form of model overfitting.

268  
269 It was estimated that a HOMA2-IR more than 1.3 represented a hazard ratio of >3.2 for developing  
270 T2DM over ~5 years in 95,450 subjects.<sup>74</sup> This analysis is the largest study to date linking a  
271 particular HOMA2-IR value to incipient diabetes and we used this cutoff in the present study.  
272 Interestingly, in exploratory analysis, 83% of those with the most severe IR (HOMA2-IR $\geq$ 2.4)  
273 were not classified as metabolically compromised when using fasting glucose or their 2-hour-  
274 glucose OGTT data.<sup>12</sup> The current reliance on glucose-centric risk assessment also limits our  
275 ability to identify and hence intervene in those people with the “least effective” response to insulin  
276 (defined as the totality of all of insulin’s key physiology). Nevertheless, all the surrogate variables  
277 investigated in the present study have limited ability to *diagnose* IR in a cross-sectional setting,  
278 and *no* ability to track changes in IR with life-style treatment.

279 In summary, we evaluated multiple predictive models for IR, including models incorporating well  
280 validated cholesterol species and BCAA. These models failed to forecast change in IR status  
281 following supervised lifestyle modification. A limitation of our study is the limited metabolomic  
282 variables gathered across cohorts (although this would mainly impact on the identification of novel  
283 metabolites to consider). Nevertheless, any new blood based metabolic disease biomarkers  
284 reported to track improvements in insulin sensitivity across multiple independent cohorts would  
285 require substantial independent clinical studies to validate beyond the level of the models evaluated  
286 in the present study.

287

288

## 289 **Materials and Methods**

290

### 291 *Clinical Cohorts*

292 The MP cohort consisted of 189 active participants, recruited as previously described from five  
293 geographical regions across Europe.<sup>12</sup> All clinical methods relied on cross-site standard operating  
294 procedures (SOPs), while insulin and metabolomic measures were performed in a single central  
295 laboratory. All participants were classified as sedentary (<600 metabolic equivalents (METs)  
296 min<sup>-1</sup>·wk<sup>-1</sup>) using a modified International Physical Activity Questionnaire,<sup>75</sup> and had a fasting  
297 blood glucose level consistent with World Health Organisation (WHO) criteria for impaired  
298 glucose tolerance ( $5.5 < \text{IGT} < 7.0 \text{ mmol} \cdot \text{l}^{-1}$ ), and/or a BMI  $> 27 \text{ kg} \cdot \text{m}^{-2}$ . Participants were excluded  
299 if they had evidence of active cardiovascular, cerebrovascular, respiratory, gastrointestinal or renal  
300 disease or had a history of malignancy, coagulation dysfunction, musculoskeletal or neurological  
301 disorders, recent steroid or hormone replacement therapy, or any condition requiring long-term

302 drug prescriptions. Exercise training was supervised and consisted of three high intensity cycling  
303 sessions per week for 6 weeks as previously described.<sup>12</sup> Prior to the baseline assessments,  
304 participants were instructed to refrain from exercise for three days. Supine blood pressure (Omron  
305 M2, Omron Healthcare, Kyoto, Japan) and resting heart rate (RHR) were determined as the  
306 average of three consecutive measurements. Blood glucose (from a dorsal hand vein) was analysed  
307 before and during an (OGTT) using a YSI 2300 STAT Plus glucose analyser (Yellow Springs Inc.  
308 Ohio, USA). Blood was collected in lithium heparin spray-coated vacutainers (Becton Dickinson,  
309 New Jersey, USA) for analysis of insulin. The MP trial registration code is NCT01920659. The  
310 STRRIDE cohorts were composed of sedentary middle-aged individuals at risk of developing  
311 cardio-metabolic disease.<sup>9,51,52</sup> Following baseline assessments, each subject was randomized to  
312 one of a variety of exercise training programs for six to eight months with or without a modified  
313 diet.<sup>9,51,52</sup> Pre and post clinical and physiological assessments and outcomes were as previously  
314 reported.<sup>9,51,52</sup>

315

### 316 *Plasma sample insulin analysis*

317 The samples from MP and the STRIDDE studies were analysed using high sensitivity insulin  
318 ELISA (Dako A/S, Sweden). Two levels of QC solutions were run for insulin. Coefficients of  
319 variation (CV) were acceptable; 4.68-8.03 % on both levels. As we were also using the  
320 automated analyser (Immulite 2000) for analyses of all OGTT time points for insulin and c-  
321 peptide from the MP study, we also assessed available fasting sample profiles using this lower  
322 sensitivity immune-assay. To assure comparability of the results, we independently checked the  
323 assay performance for cross detection of insulin and C-peptide. The WHO standard for insulin  
324 and C-peptide were obtained from NIBSC (The National Institute for Biological Standards and

325 Control). A dilution series for both analytes was prepared and run on Dako ELISA and Immulite  
326 2000. The diluted WHO insulin standards were subjected to the same procedure as the samples.  
327 The results for both Immulite 2000 and Dako ELISA showed an acceptable correlation of  
328 expected versus measured concentration with  $R^2 = 0.9995$  and  $R^2 = 0.9923$  for Immulite 2000  
329 and Dako ELISA, respectively. The results are presented in **Figure S1**. No cross reaction  
330 between insulin and c-peptide were detected. The two assays were in broad agreement over the  
331 large concentration range of insulin used in this standard assay evaluation protocol **Figure S2**.

332

### 333 *Plasma sample metabolomic analysis*

334 Metabolomic analyses for MP has not been previously published (other than fasting glucose and  
335 insulin). All samples were randomized for sample preparation and analyses resulting in an equal  
336 distribution of all centres and possible responders and non-responders. We used hierarchical  
337 clustering of metabolomic variables to highlight that there was no systematic centre specific bias  
338 (**Figure S4**). All samples were taken after an overnight fast as arterialized venous blood and run  
339 in duplicate. Results within  $\pm 20\%$  CV were accepted unless otherwise stated; if this limit was not  
340 met the sample was rerun. Quality controls (QC) were run for all analyses and with each batch of  
341 sample preparation to ensure stable performance of the analysis procedure. QC for all analyses  
342 included in house controls made from pooled EDTA plasma from healthy controls originating  
343 from a previous study. The following methods were used for each metabolite. Sample analysis  
344 used a Konelab 20XTi photospectrometer (Thermo Fisher Scientific, Thermo Electron Oy, Vantaa  
345 Finland) for high density lipoprotein HDL cholesterol, LDL cholesterol and triacylglycerides  
346 (TAG). Amino acids were analyzed using HPLC 2695 (Waters, Watford, UK) with online  
347 derivatization and a fluorescence detector 474 (Waters, Watford, UK) using a method described

348 previously.<sup>76,77</sup> Fatty acids were analyzed using ultra-high performance liquid chromatography  
349 (Ultimate 3000 UHPLC, Thermo Fisher Scientific, Germering, Germany) coupled to a TSQ  
350 Vantage with electrospray ionization (ESI) and triple quadrupole mass spectrometer (MS/MS)  
351 (Thermo Fisher Scientific, San Jose, CA, USA). For the blood obtained from the STRRIDE  
352 cohorts' samples were analysed for plasma glucose concentration at the research site (Duke  
353 University, USA) using a Beckman–Coulter DxC600 clinical analyser (Brea, CA, United States).  
354 Insulin was analyzed (in the Stockholm lab) using the high sensitivity insulin ELISA assay (Dako  
355 Denmark A/S, Glostrup, Denmark); and fasted plasma samples were analysed on 400 MHz nuclear  
356 magnetic resonance profilers at LipoScience, now LabCorp (Morrisville, NC, United States), as  
357 previously described<sup>78</sup>. The lipoprotein parameters and the BCAA were identified by  
358 retrospectively analysing digitally stored spectra using the newly developed NMR-based  
359 lipoprotein LP4 algorithm, which correlate with mass spectrometry methods.<sup>79</sup>

360  
361 As distinct methodologies were utilised for the metabolomic analyses between MP and STRRIDE  
362 cohorts we explore the compatibility of the common metabolomic data used in our diagnostic  
363 models. For S-2 and S-PD, two methodologies were utilised for lipid related metabolomics and  
364 Bland-Altman analysis was performed to assess measurement agreement between HDL and TAG  
365 with NMR versus mass spectroscopy (**Figure S5-8**). There was good linear agreement between  
366 methods for HDL (S-2  $r^2$  0.96,  $p < 0.001$ ; S-PD  $r^2$  0.89,  $p < 0.001$ ) and TAG (S-2  $r^2$  0.99,  $p < 0.001$ ;  
367 S-PD  $r^2$  0.95,  $p < 0.001$ ). Bland-Altman analysis revealed a mean measurement error of -0.06  
368 mmol/L for HDL (S-2 **Figure 5B**, S-PD **Figure S7B**) and +0.04mmol/L (S-2 **Figure 6B**, S-PD  
369 **Figure S8B**) for TAG with 95% of observations within 1.96 standard deviation of mean. Work by  
370 Wolak-Dinsmore *et al* demonstrated that NMR overestimates VAL and LEU by >25% (mean



371 value) and underestimates ILE by 10-15% (mean value) and while MS was used in MP, S-2 and  
372 S-PD relied on NMR for BCAA quantification. Based on these known systematic differences,<sup>79</sup>  
373 modelling was performed independently in each cohort using cross-validation methods.

374

### 375 *Statistical Modelling*

376 Raw data from the clinical chemistry analyses was analysed with GraphPad Prism 5 (Software  
377 MacKiev, 2007, version 5.01) and more advanced analysis was accomplished using STATISTICA  
378 10 (StatSoft Inc., 2011, version 10.0.228.2). All subsequent analysis was performed in R version  
379 4.1.1 and 4.3.2. We utilised conventional and Bayesian strategies to model data in the present  
380 work. Potentially predictive variables were selected based on known associations with IR and  
381 T2DM. Linear regression modelling was applied to investigate associations between dependent  
382 and independent variables. Briefly, after reducing each dataset to complete cases common  
383 variables were identified across all three cohorts. The criterion for considering a clinically useful  
384 variable was pragmatic – it had to be something that could be measured cheaply and reliably in a  
385 primary care setting. Laboratory measures like maximal aerobic capacity related to IR status in  
386 some but not all cohorts but was not considered because of the time and cost required to measure  
387 it accurately. Several variables were selected based on these ease/low-cost criteria; some variables  
388 were dropped because of high collinearity (e.g. systolic blood pressure was retained in favour of  
389 diastolic blood pressure and mean arterial pressure in the Bayesian analysis). We removed  
390 participants with obesity class III (BMI >40kg/m<sup>2</sup>) for the Bayesian analysis and all continuous  
391 variables were normalised. The latter steps were carried out using the tidymodels R package  
392 (10.32614/CRAN.package.tidymodels) and applied consistently across all datasets. Collinearity  
393 between variables was checked for each dataset separately (**Figure S3**). Apart from BCAA in the

394 MP dataset there were no pairwise correlations with an absolute value  $>0.5$ . Linear models were  
395 built with student-t priors on both the intercept and slope coefficient terms ( $df=3$ ,  $mean=0$  and  
396  $scale=4$ ). These were mildly informative on the scale of the normalised data. Details are in the  
397 supplementary material.

398  
399 We built Bayesian multivariable linear models using the brms package to predict change in  
400 circulating insulin using relevant clinical variables, circulating BCAA levels and selective lipids.<sup>80</sup>  
401 These full models were considered reference models. We then used projective prediction to  
402 identify a subset of variables with predictive performance as close as possible to that of the  
403 reference model.<sup>58</sup> Briefly projective prediction first generates a solution path - the variable  
404 ranking - for each sub model examined. Next a leave-one-out cross-validation process determines  
405 the predictive performance of each sub model along the predictor ranking.

406

#### 407 **Funding**

408 The clinical data utilised in this study was funded by multiple sources: European Union Seventh  
409 Framework Programme (META-PREDICT, HEALTH-F2-2012-277936); STRRIDE II  
410 (NCT00275145) by NHLBI grant HL-057354 and STRRIDE-PD (NCT00962962) by NIDDK  
411 DK-081559 and R01DK081559. The data modelling was supported by Augur Precision Medicine  
412 LTD.

413

#### 414 **Competing interests**

415 None declared. JT is a major shareholder in APM, however there is no commercial link between  
416 APM and the present study. There are no other financial conflicts of interest to disclose.

417

## 418 **Contributions**

419 RJB, JAT, OR and IJG conceptualized aims and designed the analysis strategy. All authors  
420 contributed to the project design, data collection and/or pre-processing. RJB and IJG performed  
421 data analysis and JAT contributed to interpretation. JAT and RJB wrote the first draft and JAT,  
422 RJB and IJG produced a full manuscript that all authors contributed to and have read and approved  
423 the final manuscript. JT wrote the HEALTH-F2-2012-277936 grant application.

424

## 425 **Data and code availability**

426 Some or all datasets generated during and/or analysed during the current study are not publicly  
427 available but are available from the corresponding author on reasonable request. Data and the  
428 analysis script can be found at **10.5281/zenodo.13819578**.

429

## 430 **References**

- 431 1. Cen HH, Hussein B, Botezelli JD, et al. Human and mouse muscle transcriptomic analyses  
432 identify insulin receptor mRNA downregulation in hyperinsulinemia-associated insulin resistance.  
433 *FASEB Journal*. 2022;36(1). doi:10.1096/fj.202100497RR
- 434 2. Wamil M, Coleman RL, Adler AI, McMurray JJV, Holman RR. Increased Risk of Incident Heart  
435 Failure and Death Is Associated With Insulin Resistance in People With Newly Diagnosed Type 2  
436 Diabetes: UKPDS 89. *Diabetes Care*. 2021;44(8):1877-1884. doi:10.2337/DC21-0429
- 437 3. Folch J, Olloquequi J, Ettcheto M, et al. The Involvement of Peripheral and Brain Insulin  
438 Resistance in Late Onset Alzheimer's Dementia. *Front Aging Neurosci*. 2019;11(September):1-16.  
439 doi:10.3389/fnagi.2019.00236
- 440 4. Dennis JM, Shields BM, Henley WE, Jones AG, Hattersley AT. Disease progression and  
441 treatment response in data-driven subgroups of type 2 diabetes compared with models based on  
442 simple clinical features: an analysis using clinical trial data. *Lancet Diabetes Endocrinol*.  
443 2019;7(6):442-451. doi:10.1016/S2213-8587(19)30087-7
- 444 5. Knowler WC, Fowler SE, Hamman RF, et al. 10-year follow-up of diabetes incidence and weight  
445 loss in the Diabetes Prevention Program Outcomes Study. *Lancet*. 2009;374(9702):1677-1686.

- 446 6. Wing RR, Bolin P, Brancati FL, et al. Cardiovascular effects of intensive lifestyle intervention in  
447 type 2 diabetes. *New England Journal of Medicine*. 2013;369(2):145-154.  
448 doi:10.1056/NEJMoa1212914
- 449 7. Uusitupa M, Peltonen M, Lindström J, et al. Ten-year mortality and cardiovascular morbidity in  
450 the Finnish Diabetes Prevention Study - Secondary analysis of the randomized trial. *PLoS One*.  
451 2009;4(5):1-8. doi:10.1371/journal.pone.0005656
- 452 8. Hivert MF, Christophi CA, Franks PW, et al. Lifestyle and metformin ameliorate insulin  
453 sensitivity independently of the genetic burden of established insulin resistance variants in  
454 diabetes prevention program participants. *Diabetes*. 2016;65(2):520-526. doi:10.2337/db15-0950
- 455 9. Ross LM, Slentz CA, Kraus WE. Evaluating Individual Level Responses to Exercise for Health  
456 Outcomes in Overweight or Obese Adults. *Front Physiol*. 2019;10. doi:10.3389/fphys.2019.01401
- 457 10. Huffman KM, Slentz CA, Bateman LA, et al. Exercise-induced changes in metabolic  
458 intermediates, hormones, and inflammatory markers associated with improvements in insulin  
459 sensitivity. *Diabetes Care*. 2011;34(1):174-176. doi:10.2337/dc10-0709
- 460 11. AbouAssi H, Slentz C a, Mikus CR, et al. The Effects of Aerobic, Resistance and Combination  
461 Training on Insulin Sensitivity and secretion in Overweight Adults from STRRIDE AT/RT: A  
462 Randomized Trial. *J Appl Physiol (1985)*. 2015;118(919):jap.00509.2014.  
463 doi:10.1152/japphysiol.00509.2014
- 464 12. Phillips BE, Kelly BM, Lilja M, et al. A practical and time-efficient high-intensity interval training  
465 program modifies cardio-metabolic risk factors in adults with risk factors for type II diabetes.  
466 *Front Endocrinol (Lausanne)*. 2017;8(SEP):1-11. doi:10.3389/fendo.2017.00229
- 467 13. Timmons JA, Atherton PJ, Larsson O, et al. A coding and non-coding transcriptomic perspective  
468 on the genomics of human metabolic disease. *Nucleic Acids Res*. 2018;46(15):7772-7792.  
469 doi:10.1093/nar/gky570
- 470 14. Álvarez C, Ramírez-Campillo R, Ramírez-Vélez R, Izquierdo M. Effects and prevalence of  
471 nonresponders after 12 weeks of high-intensity interval or resistance training in women with  
472 insulin resistance: a randomized trial. *J Appl Physiol*. 2017;122:985-996.  
473 doi:10.1152/japphysiol.01037.2016.-Our
- 474 15. Sears DD, Hsiao G, Hsiao A, et al. Mechanisms of human insulin resistance and  
475 thiazolidinedione-mediated insulin sensitization. *Proc Natl Acad Sci U S A*. 2009;106(44):18745-  
476 18750. doi:10.1073/pnas.0903032106
- 477 16. Ustinova M, Ansone L, Silamikelis I, et al. Whole-blood transcriptome profiling reveals signatures  
478 of metformin and its therapeutic response. *PLoS One*. 2020;15(8 August):1-17.  
479 doi:10.1371/journal.pone.0237400
- 480 17. Ross LM, Slentz CA, Zidek AM, et al. Effects of Amount, Intensity, and Mode of Exercise  
481 Training on Insulin Resistance and Type 2 Diabetes Risk in the STRRIDE Randomized Trials.  
482 *Front Physiol*. 2021;12(February):1-10. doi:10.3389/fphys.2021.626142
- 483 18. Tang Q, Li X, Song P, Xu L. Optimal cut-off values for the homeostasis model assessment of  
484 insulin resistance (HOMA-IR) and pre-diabetes screening: Developments in research and  
485 prospects for the future. *Drug Discov Ther*. 2015;9(6):380-385. doi:10.5582/DDT.2015.01207
- 486 19. Ferrannini E, Mari A. How to measure insulin sensitivity. *J Hypertens*. 1998;16(7):895-906.  
487 doi:10.1097/00004872-199816070-00001

- 488 20. Manley SE, Stratton IM, Clark PM, Luzio SD. Comparison of II human insulin assays:  
489 Implications for clinical investigation and research. *Clin Chem*. 2007;53(5):922-932.  
490 doi:10.1373/clinchem.2006.077784
- 491 21. Miller WG, Thienpont LM, Van Uytfaange K, et al. Toward standardization of insulin  
492 immunoassays. *Clin Chem*. 2009;55(5):1011-1018. doi:10.1373/clinchem.2008.118380
- 493 22. Thambisetty M, Metter EJ, Yang A, et al. Glucose intolerance, insulin resistance, and pathological  
494 features of Alzheimer disease in the Baltimore Longitudinal Study of Aging. *JAMA Neurol*.  
495 2013;70(9):1167-1172. doi:10.1001/jamaneurol.2013.284
- 496 23. Rodríguez-Mañas L, Angulo J, Carnicero JA, El Assar M, García-García FJ, Sinclair AJ. Dual  
497 effects of insulin resistance on mortality and function in non-diabetic older adults: findings from  
498 the Toledo Study of Healthy Aging. *Geroscience*. 2022;44(2):1095-1108. doi:10.1007/s11357-  
499 021-00384-4
- 500 24. Clausen JO, Borch-Johnsen K, Ibsen H, et al. Insulin sensitivity index, acute insulin response, and  
501 glucose effectiveness in a population-based sample of 380 young healthy Caucasians: Analysis of  
502 the impact of gender, body fat, physical fitness, and life-style factors. *Journal of Clinical*  
503 *Investigation*. 1996;98(5):1195-1209. doi:10.1172/JCI118903
- 504 25. Zheng Y, Ceglarek U, Huang T, et al. Weight-loss diets and 2-y changes in circulating amino  
505 acids in 2 randomized intervention trials. *American Journal of Clinical Nutrition*.  
506 2016;103(2):505-511. doi:10.3945/ajcn.115.117689
- 507 26. Shah SH, Bain JR, Muehlbauer MJ, et al. Association of a peripheral blood metabolic profile with  
508 coronary artery disease and risk of subsequent cardiovascular events. *Circ Cardiovasc Genet*.  
509 2010;3(2):207-214. doi:10.1161/CIRCGENETICS.109.852814
- 510 27. Bloomgarden Z. Diabetes and branched-chain amino acids: What is the link? *J Diabetes*.  
511 2018;10(5):350-352. doi:10.1111/1753-0407.12645
- 512 28. Newgard CB, An J, Bain JR, et al. A branched-chain amino acid-related metabolic signature that  
513 differentiates obese and lean humans and contributes to insulin resistance. *Cell Metab*.  
514 2009;9(4):311-326. doi:10.1016/J.CMET.2009.02.002
- 515 29. Floegel A, Stefan N, Yu Z, et al. Identification of serum metabolites associated with risk of type 2  
516 diabetes using a targeted metabolomic approach. *Diabetes*. 2013;62(2):639-648.
- 517 30. Shalaurova I, Connelly MA, Garvey WT, Otvos JD. Lipoprotein insulin resistance index: a  
518 lipoprotein particle-derived measure of insulin resistance. *Metab Syndr Relat Disord*.  
519 2014;12(8):422-429. doi:10.1089/MET.2014.0050
- 520 31. Flores-Guerrero JL, Gruppen EG, Connelly MA, et al. A newly developed diabetes risk index,  
521 based on lipoprotein subfractions and branched chain amino acids, is associated with incident type  
522 2 diabetes mellitus in the prevend cohort. *J Clin Med*. 2020;9(9):1-17. doi:10.3390/jcm9092781
- 523 32. Zanetti D, Stell L, Gustafsson S, et al. Plasma proteomic signatures of a direct measure of insulin  
524 sensitivity in two population cohorts. *Diabetologia*. 2023;66(9):1643-1654. doi:10.1007/s00125-  
525 023-05946-z
- 526 33. Wang TJ, Larson MG, Vasan RS, et al. Metabolite profiles and the risk of developing diabetes.  
527 *Nat Med*. 2011;17(4):448-453. doi:10.1038/NM.2307

- 528 34. White PJ, Lapworth AL, McGarrah RW, et al. Muscle-Liver Trafficking of BCAA-Derived  
529 Nitrogen Underlies Obesity-Related Glycine Depletion. *Cell Rep.* 2020;33(6).  
530 doi:10.1016/j.celrep.2020.108375
- 531 35. Zhou M, Shao J, Wu CY, et al. Targeting BCAA catabolism to treat obesity-associated insulin  
532 resistance. *Diabetes.* 2019;68(9):1730-1746. doi:10.2337/db18-0927
- 533 36. Lin C, Sun Z, Mei Z, et al. The causal associations of circulating amino acids with blood pressure:  
534 a Mendelian randomization study. *BMC Med.* 2022;20(1). doi:10.1186/s12916-022-02612-w
- 535 37. Biswas D, Duffley L, Pulinilkunnil T. Role of branched-chain amino acid-catabolizing enzymes in  
536 intertissue signaling, metabolic remodeling, and energy homeostasis. *FASEB Journal.*  
537 2019;33(8):8711-8731. doi:10.1096/fj.201802842RR
- 538 38. White PJ, McGarrah RW, Herman MA, Bain JR, Shah SH, Newgard CB. Insulin action, type 2  
539 diabetes, and branched-chain amino acids: A two-way street. *Mol Metab.* 2021;52.  
540 doi:10.1016/J.MOLMET.2021.101261
- 541 39. Jang C, Oh SF, Wada S, et al. A branched-chain amino acid metabolite drives vascular fatty acid  
542 transport and causes insulin resistance. *Nat Med.* 2016;22(4):421-426. doi:10.1038/nm.4057
- 543 40. Lynch CJ, Adams SH. Branched-chain amino acids in metabolic signalling and insulin resistance.  
544 *Nat Rev Endocrinol.* 2014;10(12):723-736. doi:10.1038/nrendo.2014.171
- 545 41. Timmons JA, Anighoro A, Brogan RJ, et al. A human-based multi-gene signature enables  
546 quantitative drug repurposing for metabolic disease. *Elife.* 2022;11. doi:10.7554/eLife.68832
- 547 42. Soto M, Cai W, Konishi M, Kahn CR. Insulin signaling in the hippocampus and amygdala  
548 regulates metabolism and neurobehavior. *Proc Natl Acad Sci U S A.* 2019;116(13):6379-6384.  
549 doi:10.1073/pnas.1817391116
- 550 43. Chen W, Huang Q, Lazdon EK, et al. Loss of insulin signaling in astrocytes exacerbates  
551 Alzheimer-like phenotypes in a 5xFAD mouse model. *Proceedings of the National Academy of  
552 Sciences.* 2023;120(21):e2220684120. doi:10.1073/PNAS.2220684120
- 553 44. Mutch DM, Temanni MR, Henegar C, et al. Adipose gene expression prior to weight loss can  
554 differentiate and weakly predict dietary responders. *PLoS One.* 2007;2(12).  
555 doi:10.1371/journal.pone.0001344
- 556 45. Newton RL, Johnson WD, Larrivee S, et al. A Randomized Community-based Exercise Training  
557 Trial in African American Men: Aerobic Plus Resistance Training and Insulin Sensitivity in  
558 African American Men. *Med Sci Sports Exerc.* 2020;52(2):408-416.  
559 doi:10.1249/MSS.0000000000002149
- 560 46. Glynn EL, Piner LW, Huffman KM, et al. Impact of combined resistance and aerobic exercise  
561 training on branched-chain amino acid turnover, glycine metabolism and insulin sensitivity in  
562 overweight humans. *Diabetologia.* 2015;58(10):2324-2335. doi:10.1007/s00125-015-3705-6
- 563 47. Lee S, Gulseth HL, Langleite TM, et al. Branched-chain amino acid metabolism, insulin  
564 sensitivity and liver fat response to exercise training in sedentary dysglycaemic and  
565 normoglycaemic men. *Diabetologia.* 2021;64(2):410-423. doi:10.1007/s00125-020-05296-0
- 566 48. Dimenna FJ, Arad AD. The acute vs. chronic effect of exercise on insulin sensitivity: nothing lasts  
567 forever. *Cardiovasc Endocrinol Metab.* 2021;10(3):149-161.  
568 doi:10.1097/XCE.0000000000000239

- 569 49. Zheng C, Liu Z. Vascular function, insulin action, and exercise: an intricate interplay. *Trends*  
570 *Endocrinol Metab.* 2015;26(6):297-304. doi:10.1016/J.TEM.2015.02.002
- 571 50. King DS, Baldus PJ, Sharp RL, Kesl LD, Feltmeyer TL, Riddle MS. Time course for exercise-  
572 induced alterations in insulin action and glucose tolerance in middle-aged people. *J Appl Physiol*  
573 (1985). 1995;78(1):17-22. doi:10.1152/JAPPL.1995.78.1.17
- 574 51. Slentz CA, Bateman LA, Willis LH, et al. Effects of exercise training alone vs a combined  
575 exercise and nutritional lifestyle intervention on glucose homeostasis in prediabetic individuals: a  
576 randomised controlled trial. *Diabetologia.* 2016;59(10):2088-2098. doi:10.1007/s00125-016-4051-  
577 z
- 578 52. Slentz CA, Bateman LA, Willis LH, et al. Effects of aerobic vs. resistance training on visceral and  
579 liver fat stores, liver enzymes, and insulin resistance by HOMA in overweight adults from  
580 STRRIDE AT/RT. *Am J Physiol Endocrinol Metab.* 2011;301(5):1033-1039.  
581 doi:10.1152/ajpendo.00291.2011
- 582 53. An P, Teran-Garcia M, Rice T, et al. Genome-wide linkage scans for prediabetes phenotypes in  
583 response to 20 weeks of endurance exercise training in non-diabetic whites and blacks: The  
584 HERITAGE Family Study. *Diabetologia.* 2005;48(6):1142-1149. doi:10.1007/s00125-005-1769-4
- 585 54. Bouchard C, Rankinen T, Timmons JA. Genomics and genetics in the biology of adaptation to  
586 exercise. *Compr Physiol.* 2011;1(3):1603-1648. doi:10.1002/cphy.c100059
- 587 55. Phillips BE, Kelly BM, Lilja M, et al. A practical and time-efficient high-intensity interval training  
588 program modifies cardio-metabolic risk factors in adults with risk factors for type II diabetes.  
589 *Front Endocrinol (Lausanne).* 2017;8(SEP). doi:10.3389/fendo.2017.00229
- 590 56. Marott SCW, Nordestgaard BG, Tybjaerg-Hansen A, Benn M. Causal associations in type 2  
591 diabetes development. *Journal of Clinical Endocrinology and Metabolism.* 2019;104(4):1313-  
592 1324. doi:10.1210/jc.2018-01648
- 593 57. Pavone F, Piironen J, Bürkner PC, Vehtari A. Using reference models in variable selection.  
594 *Comput Stat.* 2023;38(1):349-371. doi:10.1007/s00180-022-01231-6
- 595 58. Piironen J, Paasiniemi M, Vehtari A. Projective inference in high-dimensional problems:  
596 Prediction and feature selection. *Electron J Stat.* 2020;14(1):2155-2197. doi:10.1214/20-EJS1711
- 597 59. *IDF Strategic Plan.; 2023.*
- 598 60. Keller P, Vollaard NBJ, Gustafsson T, et al. A transcriptional map of the impact of endurance  
599 exercise training on skeletal muscle phenotype. *J Appl Physiol.* 2011;110(1):46-59.  
600 doi:10.1152/jappphysiol.00634.2010
- 601 61. Manning AK, Hivert MF, Scott RA, et al. A genome-wide approach accounting for body mass  
602 index identifies genetic variants influencing fasting glycemic traits and insulin resistance. *Nat*  
603 *Genet.* 2012;44(6):659-669. doi:10.1038/ng.2274
- 604 62. Crossland H, Smith K, Idris I, Phillips BE, Atherton PJ, Wilkinson DJ. Exploring mechanistic  
605 links between extracellular branched-chain amino acids and muscle insulin resistance: an in vitro  
606 approach. *Am J Physiol Cell Physiol.* 2020;319(6):C1151-C1157.  
607 doi:10.1152/AJPCELL.00377.2020
- 608 63. Roth Flach RJ, Bollinger E, Reyes AR, et al. Small molecule branched-chain ketoacid  
609 dehydrogenase kinase (BDK) inhibitors with opposing effects on BDK protein levels. *Nat*  
610 *Commun.* 2023;14(1). doi:10.1038/S41467-023-40536-Y

- 611 64. Sitryawan A, Hawes JW, Harris RA, Shimomura Y, Jenkins AE, Hutson SM. A molecular model  
612 of human branched-chain amino acid metabolism. *Am J Clin Nutr.* 1998;68(1):72-81.  
613 doi:10.1093/AJCN/68.1.72
- 614 65. Shin AC, Fasshauer M, Filatova N, et al. Brain Insulin Lowers Circulating BCAA Levels by  
615 Inducing Hepatic BCAA Catabolism. *Cell Metab.* 2014;20(5):898-909.  
616 doi:10.1016/J.CMET.2014.09.003
- 617 66. Sayda MH, Abdul Aziz MH, Gharahdaghi N, et al. Caloric restriction improves glycaemic control  
618 without reducing plasma branched-chain amino acids or keto-acids in obese men. *Sci Rep.*  
619 2022;12(1). doi:10.1038/S41598-022-21814-Z
- 620 67. Pavone F, Piironen J, Bürkner PC, Vehtari A. Using reference models in variable selection.  
621 *Comput Stat.* 2023;38(1):349-371. doi:10.1007/S00180-022-01231-6/FIGURES/9
- 622 68. Piironen J, Paasiniemi M, Vehtari A. Projective inference in high-dimensional problems:  
623 Prediction and feature selection. <https://doi.org/10.1214/20-EJS1711>. 2020;14(1):2155-2197.  
624 doi:10.1214/20-EJS1711
- 625 69. Tripathy D, Cobb JE, Gall W, et al. A novel insulin resistance index to monitor changes in insulin  
626 sensitivity and glucose tolerance: The ACT NOW study. *Journal of Clinical Endocrinology and*  
627 *Metabolism.* 2015;100(5):1855-1862. doi:10.1210/jc.2014-3824
- 628 70. Wallace TM, Levy JC, Matthews DR, Homa T. Use and Abuse of HOMA Modeling. *Diabetes*  
629 *Care.* 2004;27(6):1487-1495.
- 630 71. Levy JC, Matthews DR, Hermans MP. Correct homeostasis model assessment (HOMA)  
631 evaluation uses the computer program. *Diabetes Care.* 1998;21(12):2191-2192.  
632 doi:10.2337/DIACARE.21.12.2191
- 633 72. Matsuda M, DeFronzo RA. Insulin Sensitivity Indices Obtained From Comparison with the  
634 euglycemic insulin clamp. *Diabetes Care.* 1999;22(9):1462-1470.
- 635 73. Utzschneider KM, Prigeon RL, Faulenbach M V., et al. Oral Disposition index predicts the  
636 development of future diabetes above and beyond fasting and 2-h glucose levels. *Diabetes Care.*  
637 2009;32(2):335-341. doi:10.2337/dc08-1478
- 638 74. Marott SCW, Nordestgaard BG, Tybjaerg-Hansen A, Benn M. Causal associations in type 2  
639 diabetes development. *Journal of Clinical Endocrinology and Metabolism.* 2019;104(4):1313-  
640 1324. doi:10.1210/jc.2018-01648
- 641 75. Hagströmer M, Oja P, Sjöström M. The International Physical Activity Questionnaire (IPAQ): a  
642 study of concurrent and construct validity. *Public Health Nutr.* 2006;9(6):755-762.
- 643 76. Godel H, Graser T, Földi P, Pfaender P, Fürst P. Measurement of free amino acids in human  
644 biological fluids by high-performance liquid chromatography. *J Chromatogr A.* 1984;297:49-61.  
645 doi:https://doi.org/10.1016/S0021-9673(01)89028-2
- 646 77. Vesali RF, Klaude M, Rooyackers O, Wernerman J. Amino acid metabolism in leg muscle after an  
647 endotoxin injection in healthy volunteers. *Am J Physiol Endocrinol Metab.* 2005;288:360-364.  
648 doi:10.1152/ajpendo.00248.2004.-Decreased
- 649 78. Jeyarajah EJ, Cromwell WC, Otvos JD. Lipoprotein particle analysis by nuclear magnetic  
650 resonance spectroscopy. *Clin Lab Med.* 2006;26(4):847-870. doi:10.1016/J.CLL.2006.07.006



- 651 79. Wolak-Dinsmore J, Gruppen EG, Shalurova I, et al. A novel NMR-based assay to measure  
652 circulating concentrations of branched-chain amino acids: Elevation in subjects with type 2  
653 diabetes mellitus and association with carotid intima media thickness. *Clin Biochem.* 2018;54:92-  
654 99. doi:10.1016/J.CLINBIOCHEM.2018.02.001
- 655 80. Bürkner PC. brms: An R package for Bayesian multilevel models using Stan. *J Stat Softw.*  
656 2017;80. doi:10.18637/jss.v080.i01
- 657  
658

659 **Table 1.**

|                                     | MP           |              | S2          |              | S-PD        |             |
|-------------------------------------|--------------|--------------|-------------|--------------|-------------|-------------|
|                                     | Pre          | Post         | Pre         | Post         | Pre         | Post        |
| <b>N</b>                            | <b>179</b>   | <b>109</b>   | <b>116</b>  | <b>85</b>    | <b>149</b>  | <b>122</b>  |
| <b>Gender</b><br>(f:m)              | 100:79       | 58:51        | 58:58       | 43:41        | 89:60       | 71:51       |
| <b>Age</b>                          | 38 (18)      | 38 (18)      | 50 (14.5)   | 50 (17)      | 59 (11)     | 59 (12)     |
| <b>Weight (kg)</b>                  | 91.5 (20.1)  | 91.6 (21)    | 88 (17.5)   | 85.5 (13.2)  | 86.2 (17.4) | 83.7 (16.5) |
| <b>BMI</b>                          | 31 (5.5)     | 30.6 (4.766) | 30.4 (4.88) | 30 (5)       | 30.2 (4.45) | 29.4 (4.6)  |
| <b>SBP</b><br>(mmHg)                | 125 (14)     | 121 (16)     | 119 (16)    | 121 (18)     | 126 (16)    | 122 (21)    |
| <b>DPB</b><br>(mmHg)                | 78 (13)      | 77 (14)      | 80 (14)     | 80 (14)      | 75 (12)     | 72 (13)     |
| <b>MAP</b><br>(mmHg)                | 94 (13)      | 90 (12)      | 93 (15)     | 80 (14)      | 91 (13)     | 89 (13)     |
| <b>Resting HR</b>                   | 70 (12)      | 68 (12)      | 74 (16)     | NA           | NA          | NA          |
| <b>VO2 max</b><br>(mL/min/kg)       | 27.5 (10)    | 30.2 (11)    | 26.7 (7.56) | 30.7 (9.6)   | 23.8 (7.05) | 26 (8.25)   |
| <b>Fasting glucose</b><br>(mmol/L)  | 4.61 (0.43)  | 4.6 (0.4)    | 5.26 (0.65) | 5.33 (0.77)  | 5.78 (0.78) | 5.81 (0.74) |
| <b>2-hour glucose</b><br>(mmol/L)   | 6.67 (1.51)  | 6.32 (1.9)   | NA          | NA           | 7.66 (3.43) | 7.22 (2.3)  |
| <b>Fasting insulin (imm)</b>        | 84.4 (65.4)  | 78.7 (51.7)  | 55.7 (43.7) | 44.3 (33.5)  | 236 (234)   | 195 (199)   |
| <b>Fasting insulin (ELISA)</b>      | 57.7 (42.5)  | 50.9 (37.6)  | 30.7 (43.7) | 36.6 (33.2)  | 49.6 (58.4) | 40.3 (47.2) |
| <b>HOMA2 IR</b>                     | 1.2 (0.9)    | 1.07 (0.8)   | 1.07 (1)    | 0.81 (0.71)  | 1.12 (1.3)  | 0.95 (1.07) |
| <b>Sum BCAA</b><br>( $\mu$ mol/L)   | 424 (133)    | 438 (139)    | 424 (90.4)  | 465 (85.5)   | 439 (99.1)  | 429 (96.1)  |
| <b>Leucine</b><br>( $\mu$ mol/l)    | 120 (40.6)   | 126 (39)     | 153 (36.2)  | 171.7 (39.5) | 148 (37.9)  | 148 (35.1)  |
| <b>Isoleucine</b><br>( $\mu$ mol/L) | 62.89 (22.6) | 63.8 (21.7)  | 66.8 (20.1) | 65.6 (22.5)  | 62.8 (19.7) | 59.8 (14.5) |
| <b>Valine</b><br>( $\mu$ mol/l)     | 239 (70.2)   | 247 (75.5)   | 208 (51.8)  | 230 (50)     | 221 (50.2)  | 220 (49.5)  |
| <b>HDL</b><br>(mmol/L)              | 1.02 (0.39)  | 1.04 (0.4)   | 0.9 (0.33)  | 1.12 (0.33)  | 1.06 (0.39) | 1.11 (0.37) |
| <b>LDL</b><br>(mmol/L)              | 2.64 (0.99)  | 2.5 (0.96)   | 2.45 (0.87) | 2.72 (0.75)  | 3.12 (0.96) | 2.96 (0.82) |
| <b>TAG</b><br>(mmol/L)              | 1.17 (0.75)  | 1.09 (0.72)  | 1.4 (0.85)  | 1.25 (0.78)  | 1.3 (0.83)  | 1.18 (0.95) |
| <b>ALA</b><br>( $\mu$ mol/L)        | 321 (107)    | 326 (127)    | 419 (110)   | 405 (150)    | 399 (98)    | 390 (123)   |

660

661

662 **Table 1. Demographics. Median and IQR.** All available samples were utilised for baseline  
 663 modelling. In each analysis, only subjects with complete data were used in the pre/post  
 664 modelling, resulting in ~ 20% fewer subjects than recruited or completing the intervention.

665

666 **Table 2.**

| Cohort                                                                                                                                                                  | Model | RMSE  | MAE   | r <sup>2</sup> | Adj r <sup>2</sup> | p value |
|-------------------------------------------------------------------------------------------------------------------------------------------------------------------------|-------|-------|-------|----------------|--------------------|---------|
| <b>MP</b><br>n=179                                                                                                                                                      | 1     | 0.208 | 0.167 | 0.272          | 0.255              | <0.001  |
|                                                                                                                                                                         | 2     | 0.205 | 0.164 | 0.302          | 0.282              | <0.001  |
|                                                                                                                                                                         | 3     | 0.208 | 0.161 | 0.309          | 0.281              | <0.001  |
|                                                                                                                                                                         | 4     | 0.206 | 0.161 | 0.327          | 0.295              | <0.001  |
| <b>S-2</b><br>n=116                                                                                                                                                     | 1     | 0.267 | 0.215 | 0.265          | 0.238              | <0.001  |
|                                                                                                                                                                         | 2     | 0.271 | 0.221 | 0.298          | 0.266              | <0.001  |
|                                                                                                                                                                         | 3     | 0.255 | 0.208 | 0.366          | 0.325              | <0.001  |
|                                                                                                                                                                         | 4     | 0.254 | 0.208 | 0.389          | 0.343              | <0.001  |
| <b>S-PD</b><br>n=149                                                                                                                                                    | 1     | 0.295 | 0.237 | 0.202          | 0.18               | <0.001  |
|                                                                                                                                                                         | 2     | 0.281 | 0.227 | 0.265          | 0.239              | <0.001  |
|                                                                                                                                                                         | 3     | 0.293 | 0.229 | 0.304          | 0.269              | <0.001  |
|                                                                                                                                                                         | 4     | 0.291 | 0.223 | 0.339          | 0.301              | <0.001  |
| Model 1 = age+gender+log <sub>10</sub> BMI+fasting glucose<br>Model 2 = model 1 + sumBCAA<br>Model 3 = model 1 + HDL+LDL+TAG<br>Model 4 = model 1 + HDL+LDL+TAG+sumBCAA |       |       |       |                |                    |         |

667  
668  
669  
670  
671

**Table 2.** K-fold cross validation multiple linear regression predicting baseline log<sub>10</sub> fasting insulin from clinical and metabolomic variables.

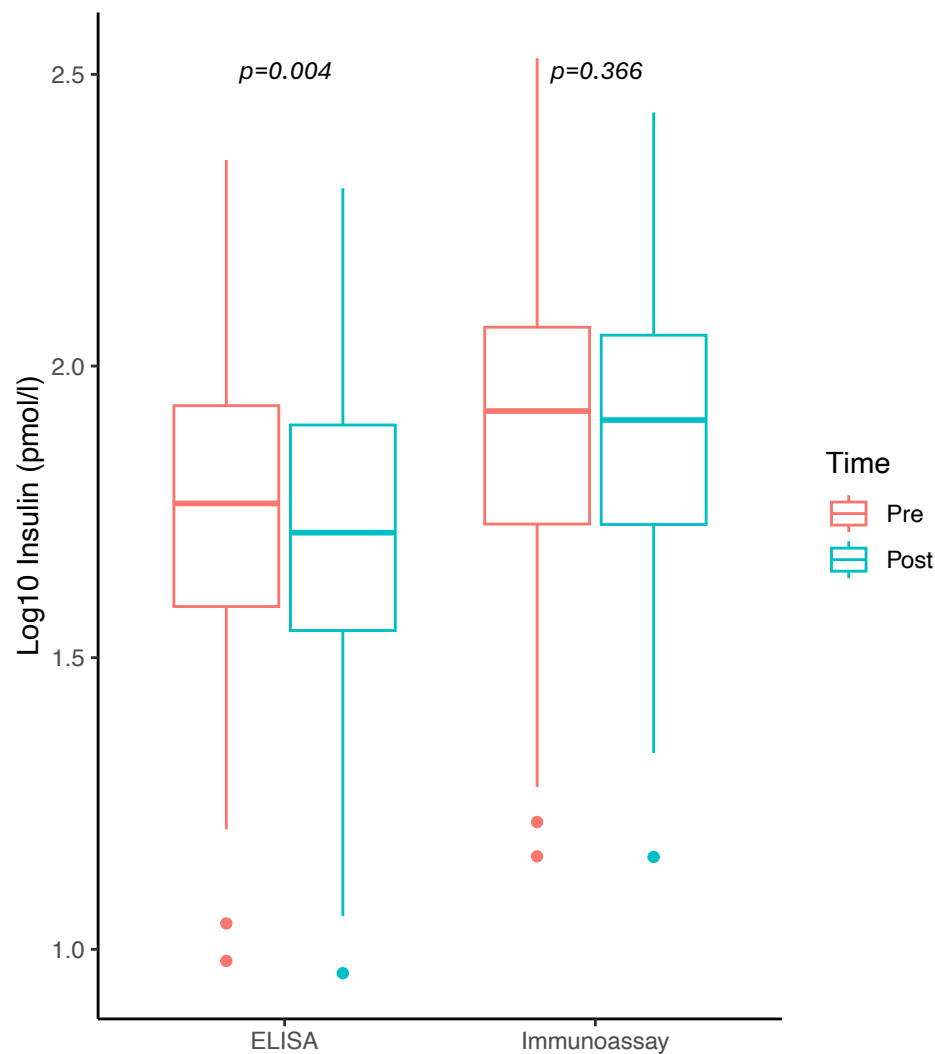

672

673 **Figure 1.** Insulin assay statistical performance for identifying differences in pre vs post exercise  
674 training samples (MP cohort). Fasting insulin (pmol/L) was measured using a high sensitivity  
675 ELISA (left) and the Immulite 2000 automated analyser (right). P-values are calculated from  
676 paired t-tests on log10 fasting insulin (pmol/L). Only the ELISA could detect a significant  
677 treatment effect.

678

679

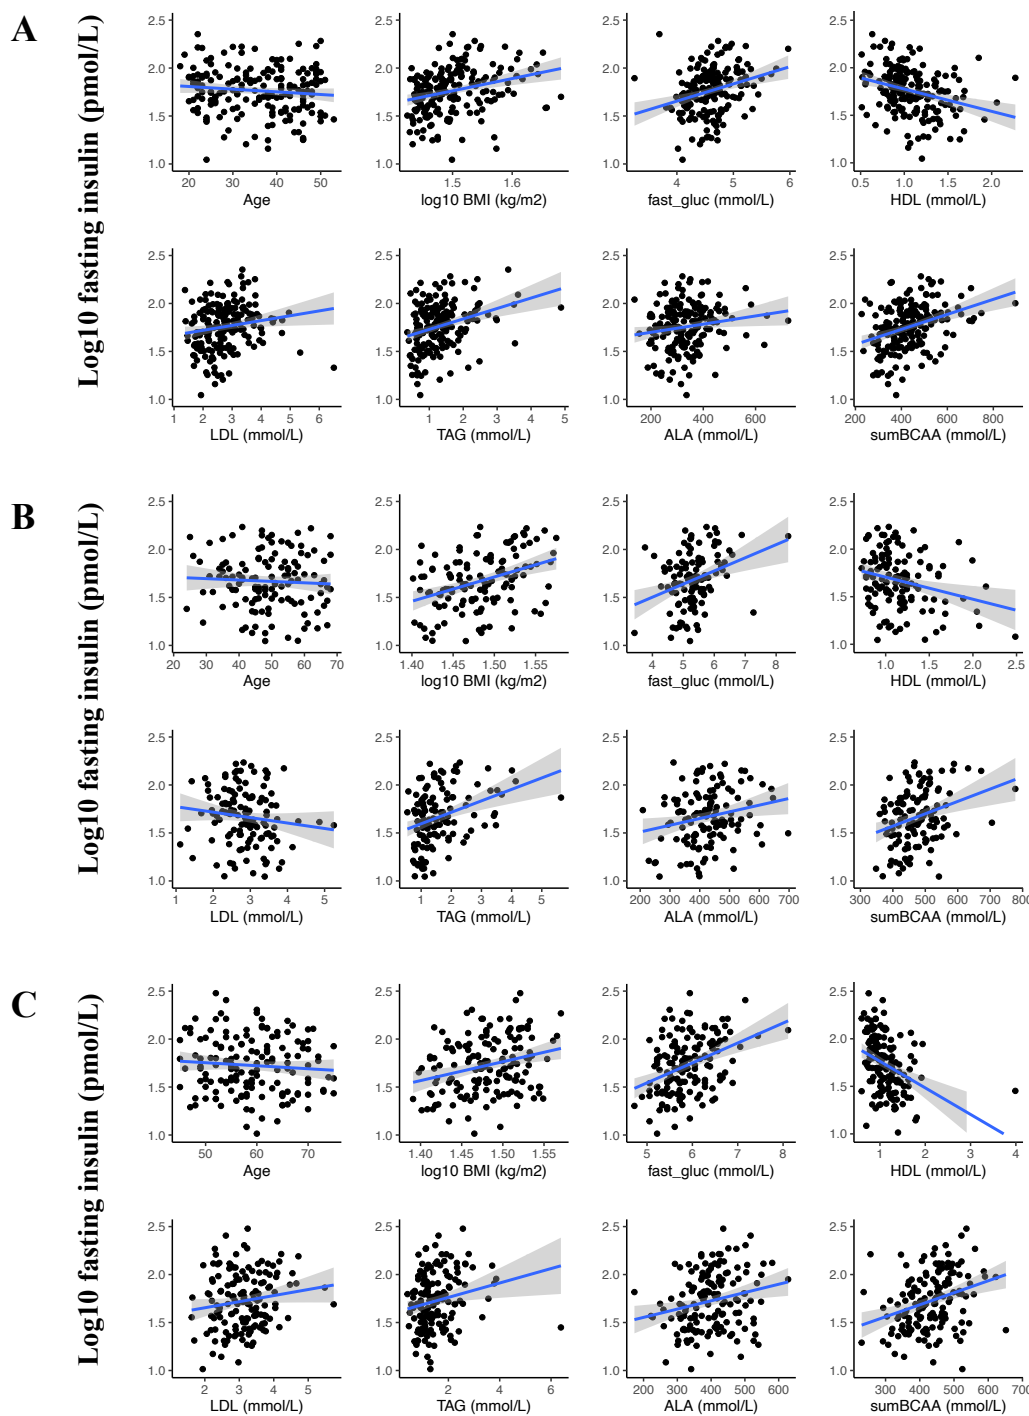

680  
681  
682  
683  
684

**Figure 2.** Scatter plots with OLS line of best fit (95% CI shaded) between log10 fasting insulin and clinical and metabolic variables. A) MP, B) S-2 and C) S-PD

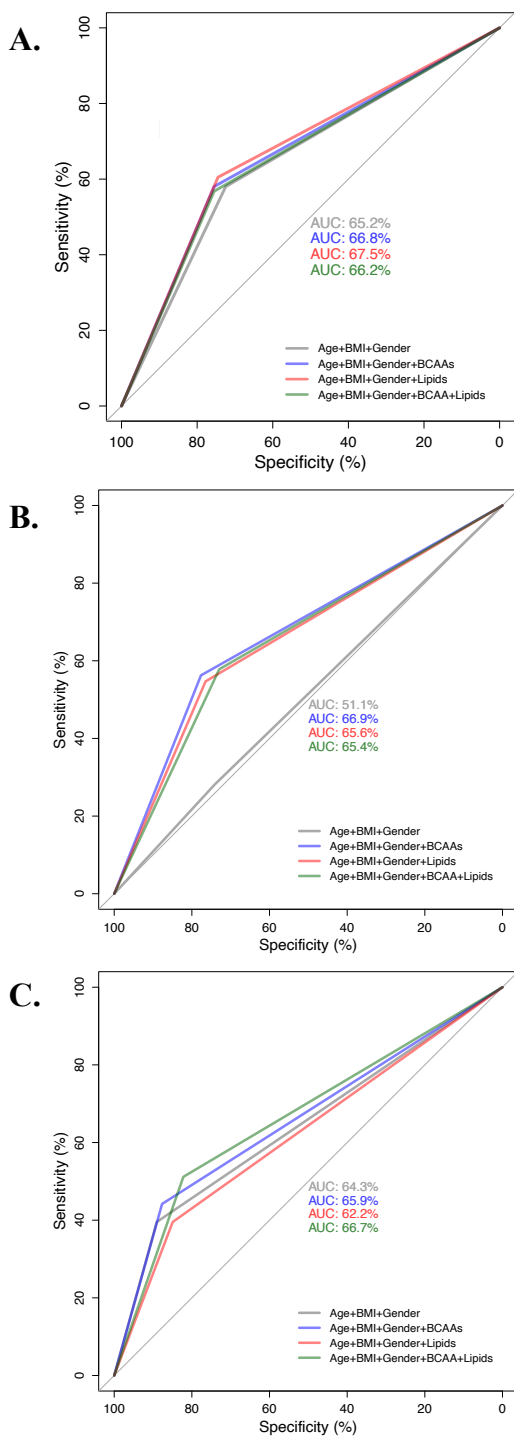

685

686 **Figure 3.** Utility of baseline clinical and metabolomic variables to classify HOMA2-IR status at  
687 1.3 unit threshold reflecting the analysis of Marott et al. K-fold cross validation logistic  
688 regression ROC curves for A. MP, B. S-2 and C. S-PD.

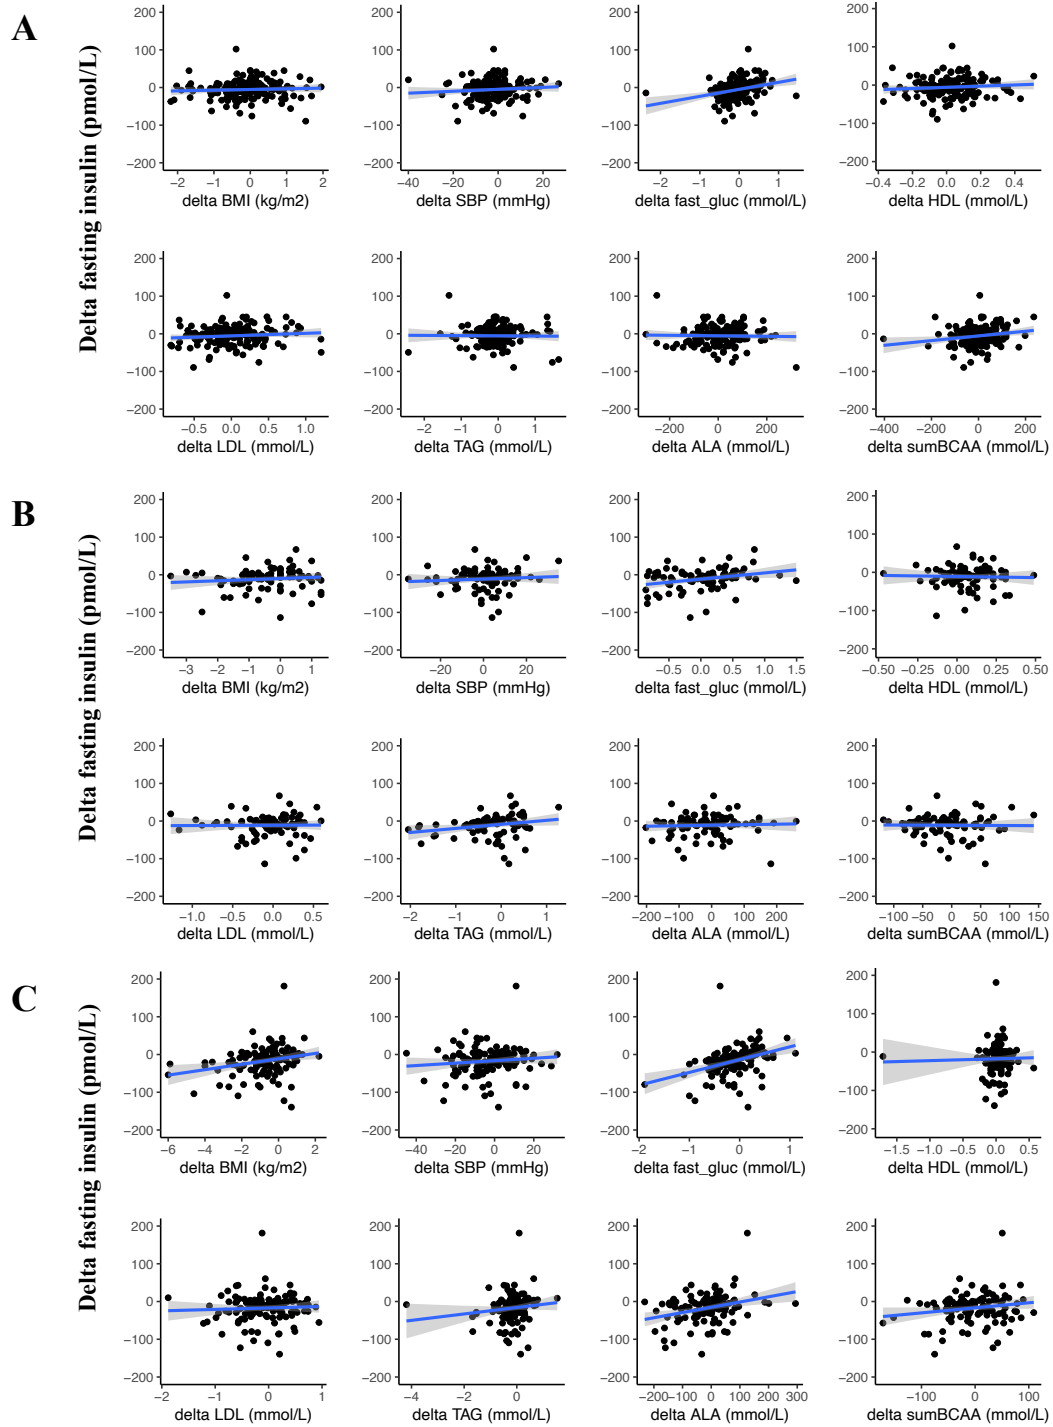

689  
690  
691  
692  
693

**Figure 4.** Scatter plots with OLS line of best fit (95% CI shaded) between delta fasting insulin and clinical and metabolic variables. A) MP, B) S-2 and C) S-PD

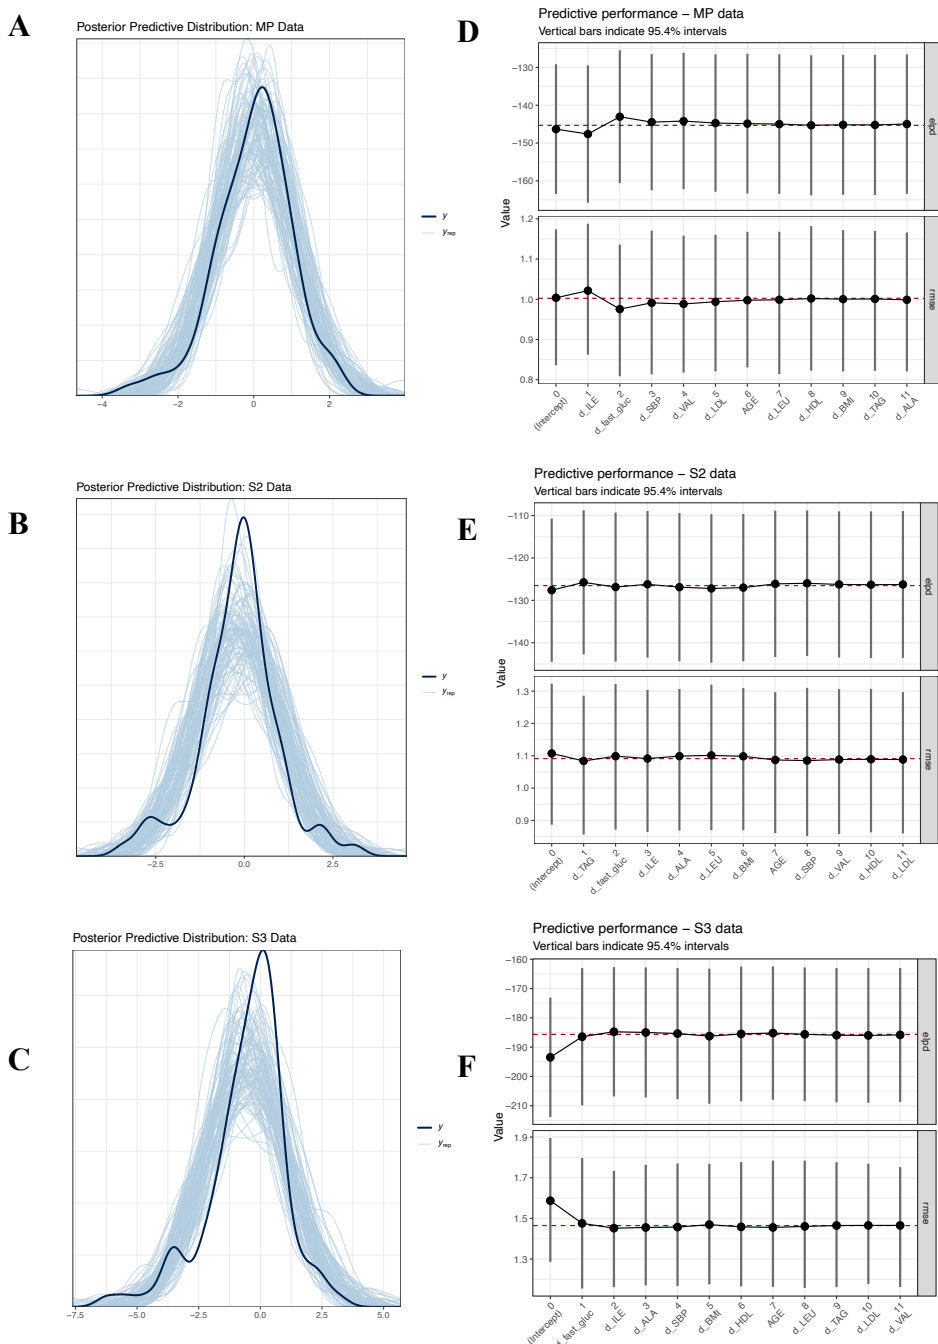

694

695 **Figure 5.** Left panel; Posterior predictive distributions for A. MP, B. S-2 and C. S-PD. Right  
 696 panel; Expected log predictive density (Elpd, upper trace) and root mean square error (RMSE,  
 697 lower trace) for D. MP, E. S-2 and F. S-PD. Elpd and RMSE are shown with 95% nominal  
 698 coverage intervals.



699 **Table S1.** Linear regression modelling using log10 fasting insulin as dependant variable. Note the sample sizes reflecting all subjects  
700 with data for each individual clinical parameter or metabolomic measure. In final integrated modelling only subjects with all  
701 completes values were included.

702

| META-PREDICT    |     |             |                    |           |                   |                   |                    |
|-----------------|-----|-------------|--------------------|-----------|-------------------|-------------------|--------------------|
| Model           | n   | Intercept p | Intercept estimate | Estimates | 95% CI            | p                 | Adj r <sup>2</sup> |
| Age             | 188 | <0.0001     | 1.8737             | -0.0032   | -0.0069 – 0.0005  | 0.0918            | 0.010              |
| Gender          | 186 | <0.0001     | 1.8254             | -0.1227   | -0.1928 – -0.0527 | <b>0.0007</b>     | 0.056              |
| BMI (log10)     | 188 | 0.5690      | -0.2714            | 1.3532    | 0.7283 – 1.9781   | <b>&lt;0.0001</b> | 0.084              |
| SBP             | 175 | <0.0001     | 1.1684             | 0.0048    | 0.0016 – 0.0080   | <b>0.0038</b>     | 0.042              |
| DBP             | 174 | <0.0001     | 1.2888             | 0.0060    | 0.0020 – 0.0099   | <b>0.0030</b>     | 0.044              |
| MAP             | 174 | <0.0001     | 1.1370             | 0.0066    | 0.0026 – 0.0106   | <b>0.0013</b>     | 0.053              |
| Fasting glucose | 188 | 0.1037      | -51.5267           | 25.7240   | 12.2694 – 39.1787 | <b>0.0002</b>     | 0.066              |
| HDL             | 185 | <0.0001     | 2.0214             | -0.2481   | -0.3604 – -0.1358 | <b>&lt;0.0001</b> | 0.089              |
| LDL             | 184 | <0.0001     | 1.5896             | 0.0599    | 0.0157 – 0.1041   | <b>0.0082</b>     | 0.032              |
| Triglycerides   | 187 | <0.0001     | 1.6140             | 0.1110    | 0.0615 – 0.1604   | <b>&lt;0.0001</b> | 0.091              |
| Sum of BCAA     | 184 | <0.0001     | 1.3981             | 0.0008    | 0.0005 – 0.0011   | <b>&lt;0.0001</b> | 0.123              |
| Isoleucine      | 184 | <0.0001     | 1.4579             | 0.0045    | 0.0027 – 0.0063   | <b>&lt;0.0001</b> | 0.115              |
| Leucine         | 184 | <0.0001     | 1.4408             | 0.0025    | 0.0015 – 0.0036   | <b>&lt;0.0001</b> | 0.106              |
| Valine          | 184 | <0.0001     | 1.3818             | 0.0015    | 0.0009 – 0.0021   | <b>&lt;0.0001</b> | 0.126              |

| Alanine         | 184 | <0.0001           | 1.5930             | 0.0005    | 0.0001 – 0.0009   | <b>0.0148</b>     | 0.027              |
|-----------------|-----|-------------------|--------------------|-----------|-------------------|-------------------|--------------------|
| STRIDE-2        |     |                   |                    |           |                   |                   |                    |
| Model           | n   | Intercept p       | Intercept estimate | Estimates | 95% CI            | p                 | Adj r <sup>2</sup> |
| Age             | 128 | <0.0001           | 1.7792             | -0.0027   | -0.0082 – 0.0027  | 0.3227            | 0                  |
| Gender          | 128 | <0.0001           | 1.7628             | -0.0886   | -0.2063 – 0.0290  | 0.1386            | 0.009              |
| BMI (log10)     | 128 | 0.0024            | -2.8007            | 3.0012    | 1.7913 – 4.2110   | <b>&lt;0.0001</b> | 0.154              |
| SBP             | 111 | <0.0001           | 1.2972             | 0.0029    | -0.0017 – 0.0076  | 0.2139            | 0.005              |
| DBP             | 111 | 0.0001            | 1.1314             | 0.0066    | -0.0004 – 0.0136  | 0.0650            | 0.022              |
| MAP             | 111 | 0.0002            | 1.1428             | 0.0055    | -0.0009 – 0.0119  | 0.0911            | 0.017              |
| Fasting glucose | 118 | 0.0001            | 0.9260             | 0.1394    | 0.0582 – 0.2206   | <b>0.0009</b>     | 0.083              |
| HDL             | 128 | <b>&lt;0.0001</b> | 1.8172             | -0.2448   | -0.4208 – -0.0687 | <b>0.0068</b>     | 0.049              |
| LDL             | 128 | <b>&lt;0.0001</b> | 1.8172             | -0.0606   | -0.1486 – 0.0274  | 0.1753            | 0.007              |
| Triglycerides   | 128 | <b>&lt;0.0001</b> | 1.4320             | 0.1329    | 0.0677 – 0.1981   | <b>0.0001</b>     | 0.107              |
| Sum of BCAA     | 126 | <b>&lt;0.0001</b> | 0.8578             | 0.0017    | 0.0009 – 0.0024   | <b>0.0001</b>     | 0.117              |
| Isoleucine      | 126 | <b>&lt;0.0001</b> | 1.2102             | 0.0066    | 0.0029 – 0.0102   | <b>0.0005</b>     | 0.085              |
| Leucine         | 126 | <b>&lt;0.0001</b> | 1.1699             | 0.0027    | 0.0008 – 0.0047   | <b>0.0064</b>     | 0.051              |
| Valine          | 126 | <b>&lt;0.0001</b> | 0.8261             | 0.0035    | 0.0019 – 0.0050   | <b>&lt;0.0001</b> | 0.13               |
| Alanine         | 128 | <b>&lt;0.0001</b> | 1.2359             | 0.0010    | 0.0003 – 0.0016   | <b>0.0027</b>     | 0.062              |

| STRRIDE PD      |     |             |                    |           |                   |                   |                    |
|-----------------|-----|-------------|--------------------|-----------|-------------------|-------------------|--------------------|
| Model           | n   | Intercept p | Intercept estimate | Estimates | 95% CI            | p                 | Adj r <sup>2</sup> |
| Age             | 155 | <0.0001     | 1.9753             | -0.0046   | -0.0116 – 0.0024  | 0.1944            | 0.005              |
| Gender          | 155 | <0.0001     | 1.7253             | -0.0395   | -0.1455 – 0.0665  | 0.463             | 0                  |
| BMI (log10)     | 155 | 0.1983      | -1.2123            | 1.9683    | 0.7168 – 3.2198   | <b>0.0023</b>     | 0.053              |
| SBP             | 134 | <0.0001     | 1.2980             | 0.0032    | -0.0009 – 0.0074  | 0.1260            | 0.010              |
| DPB             | 134 | <0.0001     | 1.4408             | 0.0035    | -0.0025 – 0.0096  | 0.2507            | 0.002              |
| MAP             | 134 | <0.0001     | 1.2897             | 0.0045    | -0.0014 – 0.0105  | 0.1365            | 0.009              |
| Fasting glucose | 154 | 0.2343      | 0.3187             | 0.2357    | 0.1464 – 0.3251   | <b>&lt;0.0001</b> | 0.146              |
| HDL             | 153 | <0.0001     | 2.0821             | -0.3326   | -0.4602 – -0.2051 | <b>&lt;0.0001</b> | 0.144              |
| LDL             | 151 | <0.0001     | 1.5234             | 0.0568    | -0.0180 – 0.1316  | 0.1355            | 0.008              |
| Triglycerides   | 153 | <0.0001     | 1.5573             | 0.0961    | 0.0311 – 0.1610   | <b>0.0040</b>     | 0.047              |
| Sum of BCAA     | 155 | <0.0001     | 1.1048             | 0.0014    | 0.0007 – 0.0021   | <b>0.0001</b>     | 0.091              |
| Isoleucine      | 155 | <0.0001     | 1.2519             | 0.0071    | 0.0038 – 0.0104   | <b>&lt;0.0001</b> | 0.098              |
| Leucine         | 155 | <0.0001     | 1.3715             | 0.0022    | 0.0004 – 0.0041   | <b>0.0159</b>     | 0.031              |
| Valine          | 155 | <0.0001     | 0.9665             | 0.0033    | 0.0021 – 0.0046   | <b>&lt;0.0001</b> | 0.147              |
| Alanine         | 155 | <0.0001     | 1.4536             | 0.0006    | -0.0000 – 0.0013  | 0.0675            | 0.015              |

704

705

706

707

**Table S2** - K-fold cross validation logistic regression model statistics for combined model predicting insulin resistance (HOMA2 IR  $\geq 1.3$ ) using age, BMI, gender, sum of branched chain amino acids, HDL, LDL and triglycerides.

|                          | <b>MP</b>           | <b>S2</b>           | <b>S-PD</b>         |
|--------------------------|---------------------|---------------------|---------------------|
| <b>Accuracy (95% CI)</b> | 0.676 (0.602-0.744) | 0.707 (0.615-0.788) | 0.644 (0.562-0.721) |
| <b>Kappa</b>             | 0.339               | 0.347               | 0.27                |
| <b>Sensitivity</b>       | 0.58                | 0.512               | 0.563               |
| <b>Specificity</b>       | 0.755               | 0.822               | 0.706               |
| <b>PPV</b>               | 0.662               | 0.629               | 0.59                |
| <b>NPV</b>               | 0.685               | 0.741               | 0.682               |
| <b>Prevalence</b>        | 0.453               | 0.371               | 0.43                |
| <b>Detection rate</b>    | 0.263               | 0.19                | 0.242               |

708

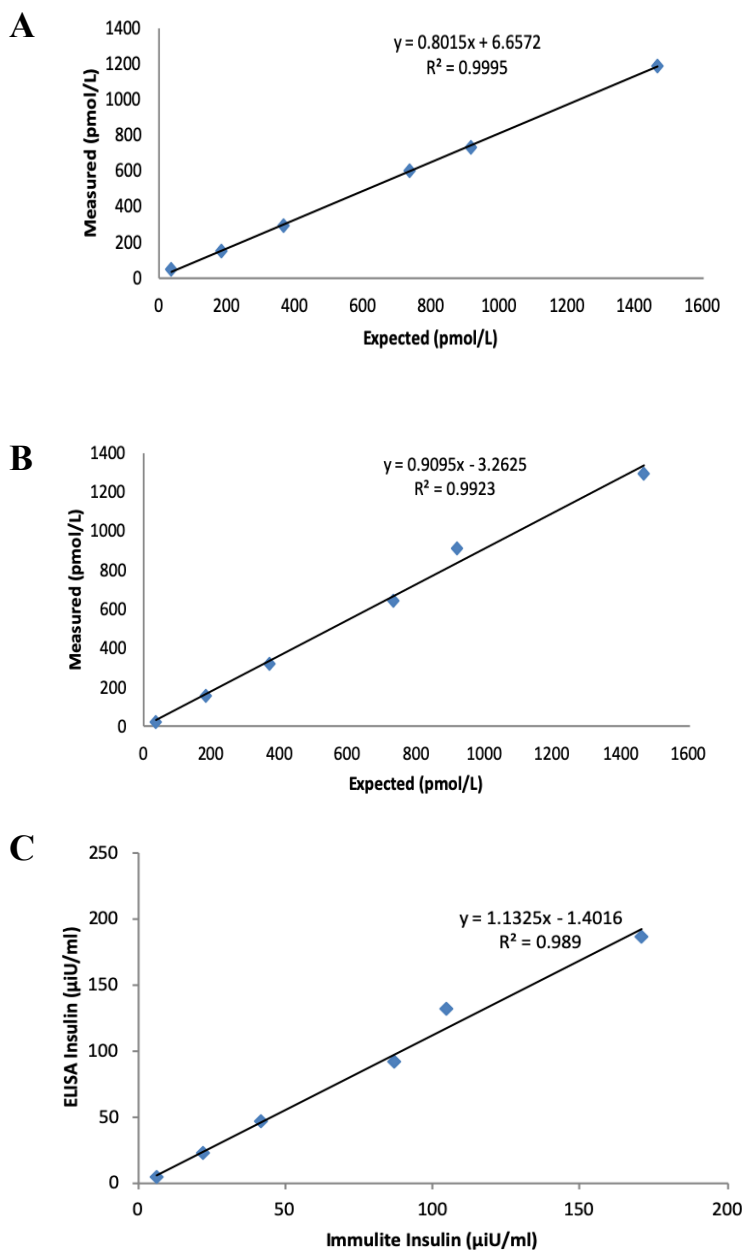

709  
710 **Figure S1.** Performance of the insulin assays. A) (Immolute using titration international insulin  
711 standard), B) (ELISA using titration international insulin standard), and C) Immolute vs ELISA  
712 standard curve values using international insulin standard once converted to uIU/ml)

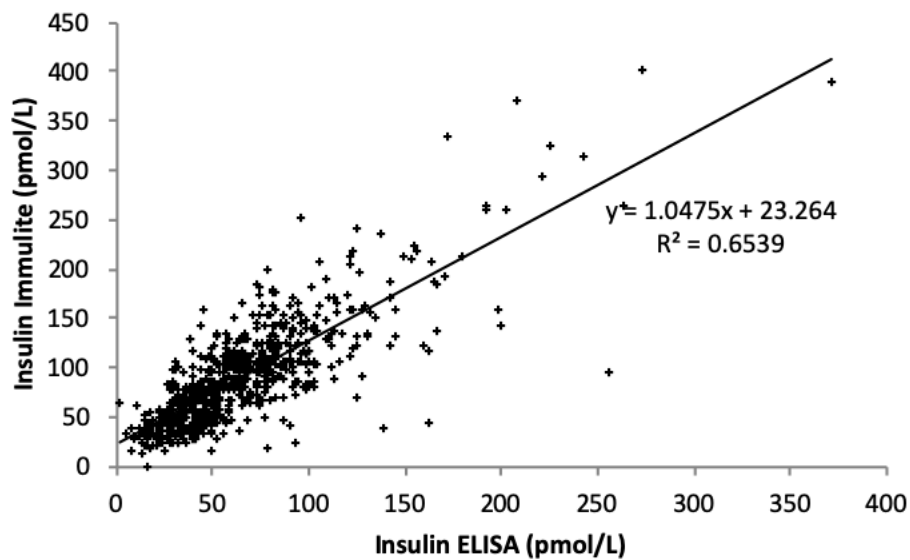

713  
714 **Figure S2.** Correlation of participant fasting insulin measured using Dako ELISA and Immulite  
715 2000 assays.  
716  
717

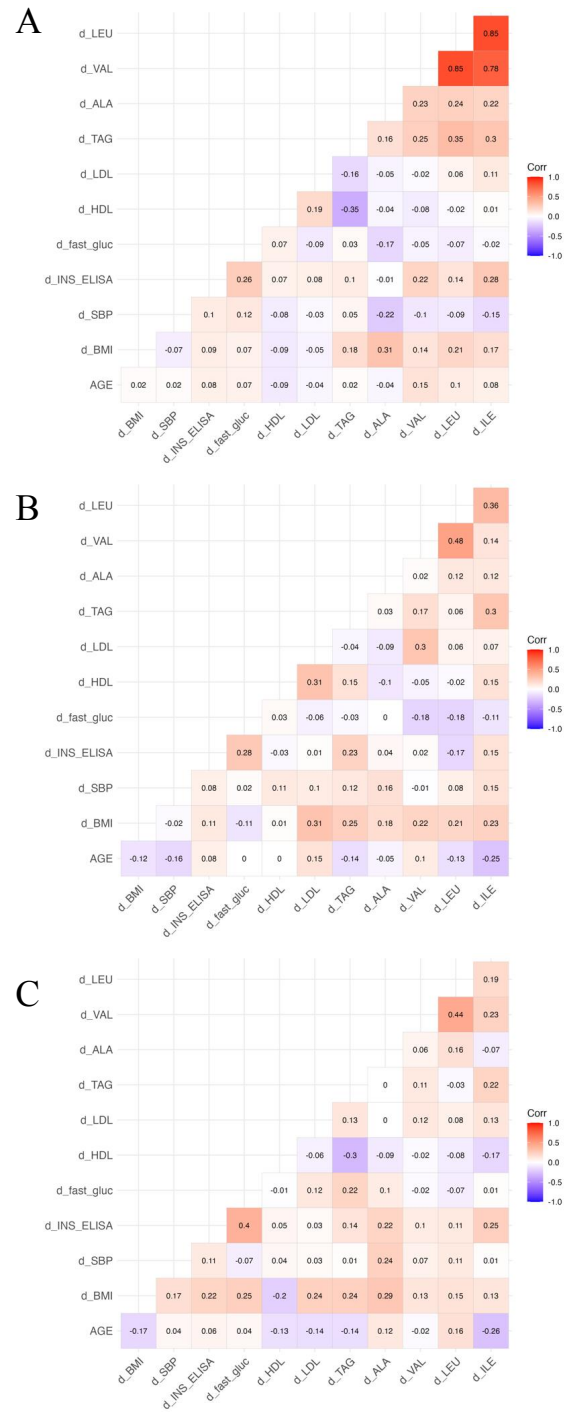

718  
 719 **Figure S3.** Correlation plots showing strength of correlation between the variables used in the  
 720 generation of linear models to predict change in circulating insulin across lifestyle interventions.  
 721 A. MP, B. S-2 and C. S-PD.

722

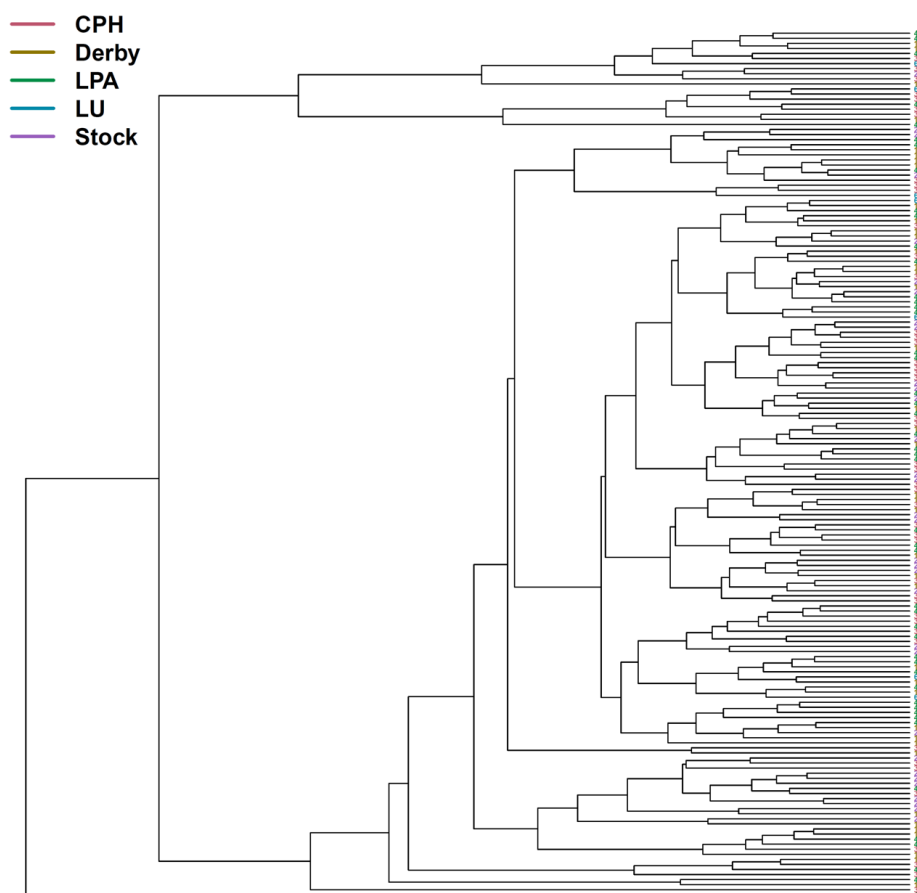

723

724

725

726

727

**Figure S4.** Hierarchical clustering of subjects by their metabolomic profile demonstrating that there is no centre specific bias.



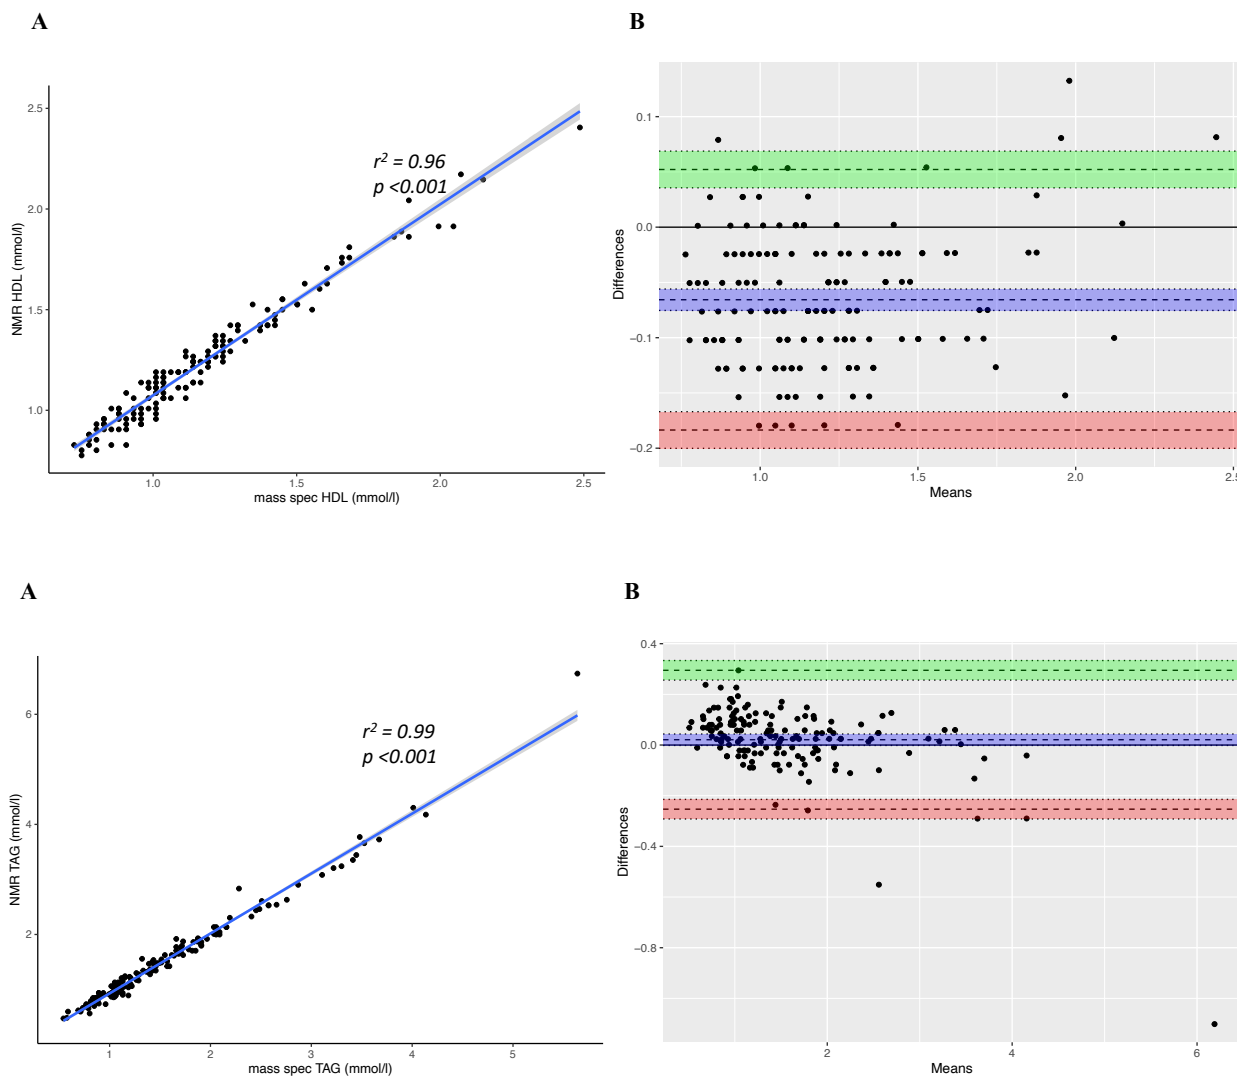

728  
729 **Figure S5-6. S5)** S-2 HDL assay performance. A) Comparison of mass spectroscopy and nuclear  
730 magnetic resonance (NMR) measurement of HDL using linear regression. B) Bland-Altman plot  
731 to estimate of bias with 95% confidence interval shown in blue, with upper (green) and lower  
732 (red) limits. **S6).** S-2 TAG assay performance. A) Comparison of mass spectroscopy and nuclear  
733 magnetic resonance (NMR) measurement of TAG using linear regression. B) Bland-Altman plot  
734 to estimate of bias with 95% confidence interval shown in blue, with upper (green) and lower  
735 (red) limits.  
736

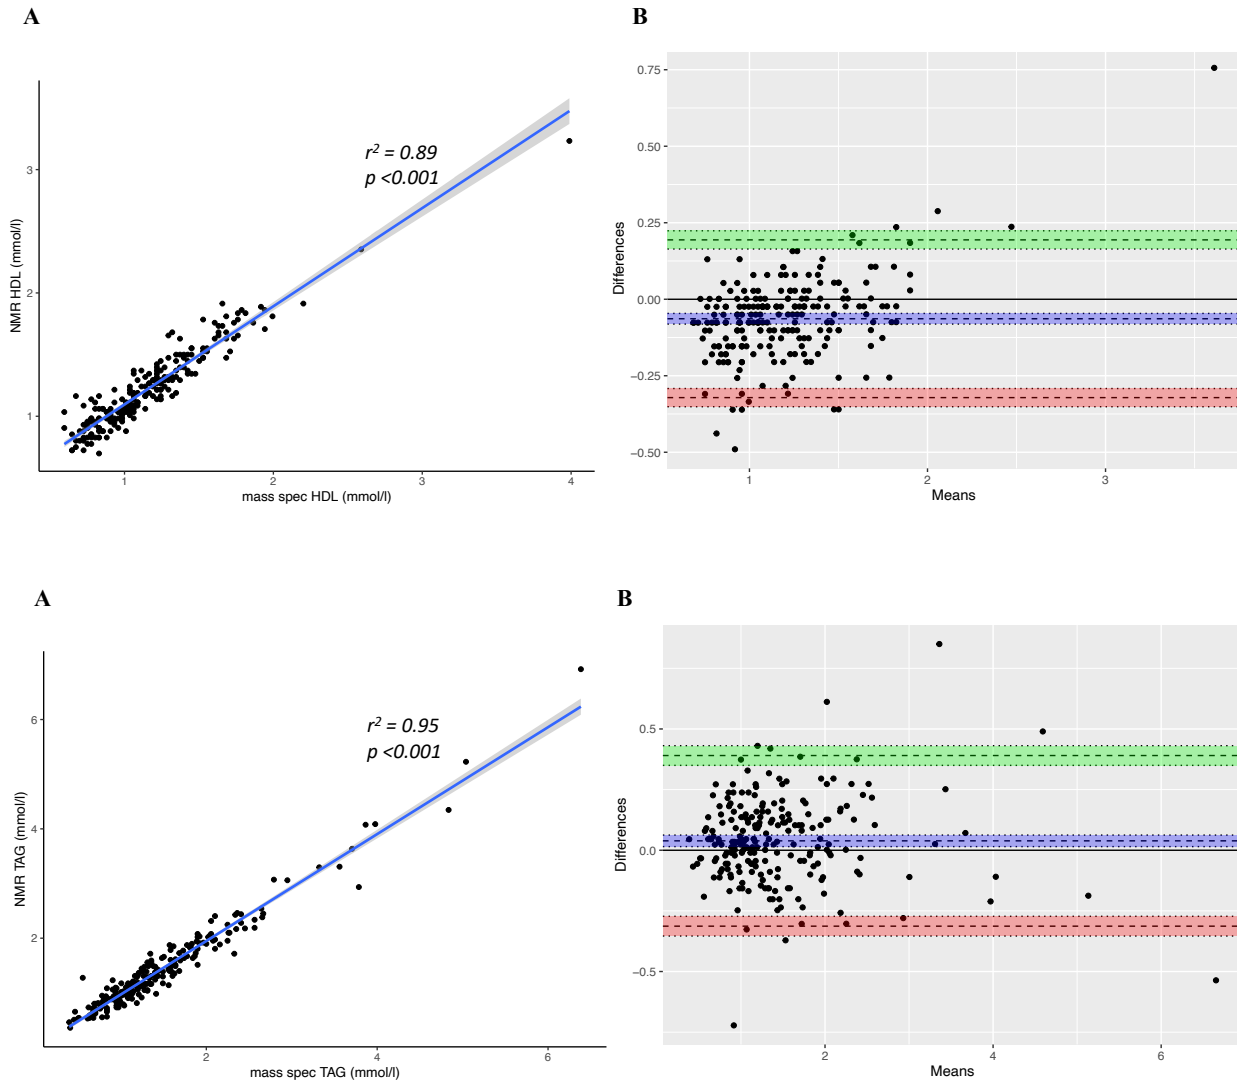

737  
738  
739  
740  
741  
742  
743  
744  
745

**Figure S7-8. S7) S-PD HDL assay performance.** A) Comparison of mass spectroscopy and nuclear magnetic resonance (NMR) measurement of HDL using linear regression. B) Bland-Altman plot to estimate of bias with 95% confidence interval shown in blue, with upper (green) and lower (red) limits. **S8). S-PD TAG assay performance.** A) Comparison of mass spectroscopy and nuclear magnetic resonance (NMR) measurement of TAG using linear regression. B) Bland-Altman plot to estimate of bias with 95% confidence interval shown in blue, with upper (green) and lower (red) limits.
